# Supplementary material
Source: publisher figshare collection journal article supplement (https://diabetesjournals.figshare.com/ndownloader/files/34172184)
Supplement: Supplementary file 1 [file 34172184]

## Sheet: youth-onset T2D
Table S7: Association of cis-pQTLs of the MR prioritzed proteins with youth-onset type 2 diabetes with nearby protein altering variants.
SNP	Location	Allele	Consequence	IMPACT	SIFT	PolyPhen	CADD_PHRED	CADD_RAW	cis-pQTLSNP	R2	Population
rs3804150	4:122838023-122838023	C	intron_variant	MODIFIER	-	-	0.248	-0.347044	FGF2 (rs308403)	0.385	CEU
rs3804150	4:122838023-122838023	C	upstream_gene_variant	MODIFIER	-	-	0.248	-0.347044	FGF2 (rs308403)	0.385	CEU
rs3804150	4:122838023-122838023	C	intron_variant	MODIFIER	-	-	0.248	-0.347044	FGF2 (rs308403)	0.385	CEU
rs3804150	4:122838023-122838023	C	intron_variant	MODIFIER	-	-	0.248	-0.347044	FGF2 (rs308403)	0.385	CEU
rs308430	4:122842972-122842972	T	intron_variant	MODIFIER	-	-	5.482	0.405029	FGF2 (rs308403)	0.449	CEU
rs308430	4:122842972-122842972	T	downstream_gene_variant	MODIFIER	-	-	5.482	0.405029	FGF2 (rs308403)	0.449	CEU
rs308430	4:122842972-122842972	T	intron_variant	MODIFIER	-	-	5.482	0.405029	FGF2 (rs308403)	0.449	CEU
rs308430	4:122842972-122842972	T	intron_variant	MODIFIER	-	-	5.482	0.405029	FGF2 (rs308403)	0.449	CEU
rs308430	4:122842972-122842972	T	regulatory_region_variant	MODIFIER	-	-	5.482	0.405029	FGF2 (rs308403)	0.449	CEU
rs308428	4:122843353-122843353	C	intron_variant	MODIFIER	-	-	7.395	0.587974	FGF2 (rs308403)	0.449	CEU
rs308428	4:122843353-122843353	G	intron_variant	MODIFIER	-	-	7.683	0.617641	FGF2 (rs308403)	0.449	CEU
rs308428	4:122843353-122843353	C	downstream_gene_variant	MODIFIER	-	-	7.395	0.587974	FGF2 (rs308403)	0.449	CEU
rs308428	4:122843353-122843353	G	downstream_gene_variant	MODIFIER	-	-	7.683	0.617641	FGF2 (rs308403)	0.449	CEU
rs308428	4:122843353-122843353	C	intron_variant	MODIFIER	-	-	7.395	0.587974	FGF2 (rs308403)	0.449	CEU
rs308428	4:122843353-122843353	G	intron_variant	MODIFIER	-	-	7.683	0.617641	FGF2 (rs308403)	0.449	CEU
rs308428	4:122843353-122843353	C	intron_variant	MODIFIER	-	-	7.395	0.587974	FGF2 (rs308403)	0.449	CEU
rs308428	4:122843353-122843353	G	intron_variant	MODIFIER	-	-	7.683	0.617641	FGF2 (rs308403)	0.449	CEU
rs308428	4:122843353-122843353	C	regulatory_region_variant	MODIFIER	-	-	7.395	0.587974	FGF2 (rs308403)	0.449	CEU
rs308428	4:122843353-122843353	G	regulatory_region_variant	MODIFIER	-	-	7.683	0.617641	FGF2 (rs308403)	0.449	CEU
rs308428	4:122843353-122843353	C	TF_binding_site_variant	MODIFIER	-	-	7.395	0.587974	FGF2 (rs308403)	0.449	CEU
rs308428	4:122843353-122843353	G	TF_binding_site_variant	MODIFIER	-	-	7.683	0.617641	FGF2 (rs308403)	0.449	CEU
rs308426	4:122843690-122843690	G	intron_variant	MODIFIER	-	-	2.727	0.164327	FGF2 (rs308403)	0.449	CEU
rs308426	4:122843690-122843690	G	downstream_gene_variant	MODIFIER	-	-	2.727	0.164327	FGF2 (rs308403)	0.449	CEU
rs308426	4:122843690-122843690	G	intron_variant	MODIFIER	-	-	2.727	0.164327	FGF2 (rs308403)	0.449	CEU
rs308426	4:122843690-122843690	G	intron_variant	MODIFIER	-	-	2.727	0.164327	FGF2 (rs308403)	0.449	CEU
rs308426	4:122843690-122843690	G	regulatory_region_variant	MODIFIER	-	-	2.727	0.164327	FGF2 (rs308403)	0.449	CEU
rs308423	4:122845588-122845588	A	intron_variant	MODIFIER	-	-	1.664	0.047894	FGF2 (rs308403)	0.449	CEU
rs308423	4:122845588-122845588	G	intron_variant	MODIFIER	-	-	1.795	0.064902	FGF2 (rs308403)	0.449	CEU
rs308423	4:122845588-122845588	A	downstream_gene_variant	MODIFIER	-	-	1.664	0.047894	FGF2 (rs308403)	0.449	CEU
rs308423	4:122845588-122845588	G	downstream_gene_variant	MODIFIER	-	-	1.795	0.064902	FGF2 (rs308403)	0.449	CEU
rs308423	4:122845588-122845588	A	intron_variant	MODIFIER	-	-	1.664	0.047894	FGF2 (rs308403)	0.449	CEU
rs308423	4:122845588-122845588	G	intron_variant	MODIFIER	-	-	1.795	0.064902	FGF2 (rs308403)	0.449	CEU
rs308423	4:122845588-122845588	A	intron_variant	MODIFIER	-	-	1.664	0.047894	FGF2 (rs308403)	0.449	CEU
rs308423	4:122845588-122845588	G	intron_variant	MODIFIER	-	-	1.795	0.064902	FGF2 (rs308403)	0.449	CEU
rs308423	4:122845588-122845588	A	regulatory_region_variant	MODIFIER	-	-	1.664	0.047894	FGF2 (rs308403)	0.449	CEU
rs308423	4:122845588-122845588	G	regulatory_region_variant	MODIFIER	-	-	1.795	0.064902	FGF2 (rs308403)	0.449	CEU
rs76414834	9:110556930-110556930	C	intron_variant	MODIFIER	-	-	0.509	-0.200814	SVEP1 (rs61751937)	0.309	CEU
rs76414834	9:110556930-110556930	C	intron_variant	MODIFIER	-	-	0.509	-0.200814	SVEP1 (rs61751937)	0.309	CEU
rs76414834	9:110556930-110556930	C	intron_variant	MODIFIER	-	-	0.509	-0.200814	SVEP1 (rs61751937)	0.309	CEU
rs199804227	11:126028374-126028375	TTTTTTTTT	intron_variant	MODIFIER	-	-	1.234	-0.016671	CDON (rs60929339)	1	CEU
rs199804227	11:126028374-126028375	TTTTTTTTTTT	intron_variant	MODIFIER	-	-	2.403	0.133054	CDON (rs60929339)	1	CEU
rs199804227	11:126028374-126028375	TTTTTTTTTTTT	intron_variant	MODIFIER	-	-	2.35	0.127645	CDON (rs60929339)	1	CEU
rs199804227	11:126028374-126028375	TTTTTTTTTTTTTTTT	intron_variant	MODIFIER	-	-	-	-	CDON (rs60929339)	1	CEU
rs199804227	11:126028374-126028375	TTTTTTTTTTTTTTTTTTTT	intron_variant	MODIFIER	-	-	-	-	CDON (rs60929339)	1	CEU
rs199804227	11:126028374-126028375	TTTTTTTTT	intron_variant	MODIFIER	-	-	1.234	-0.016671	CDON (rs60929339)	1	CEU
rs199804227	11:126028374-126028375	TTTTTTTTTTT	intron_variant	MODIFIER	-	-	2.403	0.133054	CDON (rs60929339)	1	CEU
rs199804227	11:126028374-126028375	TTTTTTTTTTTT	intron_variant	MODIFIER	-	-	2.35	0.127645	CDON (rs60929339)	1	CEU
rs199804227	11:126028374-126028375	TTTTTTTTTTTTTTTT	intron_variant	MODIFIER	-	-	-	-	CDON (rs60929339)	1	CEU
rs199804227	11:126028374-126028375	TTTTTTTTTTTTTTTTTTTT	intron_variant	MODIFIER	-	-	-	-	CDON (rs60929339)	1	CEU
rs199804227	11:126028374-126028375	TTTTTTTTT	intron_variant,non_coding_transcript_variant	MODIFIER	-	-	1.234	-0.016671	CDON (rs60929339)	1	CEU
rs199804227	11:126028374-126028375	TTTTTTTTTTT	intron_variant,non_coding_transcript_variant	MODIFIER	-	-	2.403	0.133054	CDON (rs60929339)	1	CEU
rs199804227	11:126028374-126028375	TTTTTTTTTTTT	intron_variant,non_coding_transcript_variant	MODIFIER	-	-	2.35	0.127645	CDON (rs60929339)	1	CEU
rs199804227	11:126028374-126028375	TTTTTTTTTTTTTTTT	intron_variant,non_coding_transcript_variant	MODIFIER	-	-	-	-	CDON (rs60929339)	1	CEU
rs199804227	11:126028374-126028375	TTTTTTTTTTTTTTTTTTTT	intron_variant,non_coding_transcript_variant	MODIFIER	-	-	-	-	CDON (rs60929339)	1	CEU
rs199804227	11:126028374-126028375	TTTTTTTTT	intron_variant	MODIFIER	-	-	1.234	-0.016671	CDON (rs60929339)	1	CEU
rs199804227	11:126028374-126028375	TTTTTTTTTTT	intron_variant	MODIFIER	-	-	2.403	0.133054	CDON (rs60929339)	1	CEU
rs199804227	11:126028374-126028375	TTTTTTTTTTTT	intron_variant	MODIFIER	-	-	2.35	0.127645	CDON (rs60929339)	1	CEU
rs199804227	11:126028374-126028375	TTTTTTTTTTTTTTTT	intron_variant	MODIFIER	-	-	-	-	CDON (rs60929339)	1	CEU
rs199804227	11:126028374-126028375	TTTTTTTTTTTTTTTTTTTT	intron_variant	MODIFIER	-	-	-	-	CDON (rs60929339)	1	CEU
rs199804227	11:126028374-126028375	TTTTTTTTT	intron_variant,non_coding_transcript_variant	MODIFIER	-	-	1.234	-0.016671	CDON (rs60929339)	1	CEU
rs199804227	11:126028374-126028375	TTTTTTTTTTT	intron_variant,non_coding_transcript_variant	MODIFIER	-	-	2.403	0.133054	CDON (rs60929339)	1	CEU
rs199804227	11:126028374-126028375	TTTTTTTTTTTT	intron_variant,non_coding_transcript_variant	MODIFIER	-	-	2.35	0.127645	CDON (rs60929339)	1	CEU
rs199804227	11:126028374-126028375	TTTTTTTTTTTTTTTT	intron_variant,non_coding_transcript_variant	MODIFIER	-	-	-	-	CDON (rs60929339)	1	CEU
rs199804227	11:126028374-126028375	TTTTTTTTTTTTTTTTTTTT	intron_variant,non_coding_transcript_variant	MODIFIER	-	-	-	-	CDON (rs60929339)	1	CEU
rs199804227	11:126028374-126028375	TTTTTTTTT	intron_variant,non_coding_transcript_variant	MODIFIER	-	-	1.234	-0.016671	CDON (rs60929339)	1	CEU
rs199804227	11:126028374-126028375	TTTTTTTTTTT	intron_variant,non_coding_transcript_variant	MODIFIER	-	-	2.403	0.133054	CDON (rs60929339)	1	CEU
rs199804227	11:126028374-126028375	TTTTTTTTTTTT	intron_variant,non_coding_transcript_variant	MODIFIER	-	-	2.35	0.127645	CDON (rs60929339)	1	CEU
rs199804227	11:126028374-126028375	TTTTTTTTTTTTTTTT	intron_variant,non_coding_transcript_variant	MODIFIER	-	-	-	-	CDON (rs60929339)	1	CEU
rs199804227	11:126028374-126028375	TTTTTTTTTTTTTTTTTTTT	intron_variant,non_coding_transcript_variant	MODIFIER	-	-	-	-	CDON (rs60929339)	1	CEU
rs199804227	11:126028374-126028375	TTTTTTTTT	intron_variant,non_coding_transcript_variant	MODIFIER	-	-	1.234	-0.016671	CDON (rs60929339)	1	CEU
rs199804227	11:126028374-126028375	TTTTTTTTTTT	intron_variant,non_coding_transcript_variant	MODIFIER	-	-	2.403	0.133054	CDON (rs60929339)	1	CEU
rs199804227	11:126028374-126028375	TTTTTTTTTTTT	intron_variant,non_coding_transcript_variant	MODIFIER	-	-	2.35	0.127645	CDON (rs60929339)	1	CEU
rs199804227	11:126028374-126028375	TTTTTTTTTTTTTTTT	intron_variant,non_coding_transcript_variant	MODIFIER	-	-	-	-	CDON (rs60929339)	1	CEU
rs199804227	11:126028374-126028375	TTTTTTTTTTTTTTTTTTTT	intron_variant,non_coding_transcript_variant	MODIFIER	-	-	-	-	CDON (rs60929339)	1	CEU
rs199804227	11:126028374-126028375	TTTTTTTTT	intron_variant,NMD_transcript_variant	MODIFIER	-	-	1.234	-0.016671	CDON (rs60929339)	1	CEU
rs199804227	11:126028374-126028375	TTTTTTTTTTT	intron_variant,NMD_transcript_variant	MODIFIER	-	-	2.403	0.133054	CDON (rs60929339)	1	CEU
rs199804227	11:126028374-126028375	TTTTTTTTTTTT	intron_variant,NMD_transcript_variant	MODIFIER	-	-	2.35	0.127645	CDON (rs60929339)	1	CEU
rs199804227	11:126028374-126028375	TTTTTTTTTTTTTTTT	intron_variant,NMD_transcript_variant	MODIFIER	-	-	-	-	CDON (rs60929339)	1	CEU
rs199804227	11:126028374-126028375	TTTTTTTTTTTTTTTTTTTT	intron_variant,NMD_transcript_variant	MODIFIER	-	-	-	-	CDON (rs60929339)	1	CEU
rs199804227	11:126028374-126028375	TTTTTTTTT	intron_variant	MODIFIER	-	-	1.234	-0.016671	CDON (rs60929339)	1	CEU
rs199804227	11:126028374-126028375	TTTTTTTTTTT	intron_variant	MODIFIER	-	-	2.403	0.133054	CDON (rs60929339)	1	CEU
rs199804227	11:126028374-126028375	TTTTTTTTTTTT	intron_variant	MODIFIER	-	-	2.35	0.127645	CDON (rs60929339)	1	CEU
rs199804227	11:126028374-126028375	TTTTTTTTTTTTTTTT	intron_variant	MODIFIER	-	-	-	-	CDON (rs60929339)	1	CEU
rs199804227	11:126028374-126028375	TTTTTTTTTTTTTTTTTTTT	intron_variant	MODIFIER	-	-	-	-	CDON (rs60929339)	1	CEU
rs199804227	11:126028374-126028375	TTTTTTTTT	intron_variant,non_coding_transcript_variant	MODIFIER	-	-	1.234	-0.016671	CDON (rs60929339)	1	CEU
rs199804227	11:126028374-126028375	TTTTTTTTTTT	intron_variant,non_coding_transcript_variant	MODIFIER	-	-	2.403	0.133054	CDON (rs60929339)	1	CEU
rs199804227	11:126028374-126028375	TTTTTTTTTTTT	intron_variant,non_coding_transcript_variant	MODIFIER	-	-	2.35	0.127645	CDON (rs60929339)	1	CEU
rs199804227	11:126028374-126028375	TTTTTTTTTTTTTTTT	intron_variant,non_coding_transcript_variant	MODIFIER	-	-	-	-	CDON (rs60929339)	1	CEU
rs199804227	11:126028374-126028375	TTTTTTTTTTTTTTTTTTTT	intron_variant,non_coding_transcript_variant	MODIFIER	-	-	-	-	CDON (rs60929339)	1	CEU
rs199804227	11:126028374-126028375	TTTTTTTTT	intron_variant,NMD_transcript_variant	MODIFIER	-	-	1.234	-0.016671	CDON (rs60929339)	1	CEU
rs199804227	11:126028374-126028375	TTTTTTTTTTT	intron_variant,NMD_transcript_variant	MODIFIER	-	-	2.403	0.133054	CDON (rs60929339)	1	CEU
rs199804227	11:126028374-126028375	TTTTTTTTTTTT	intron_variant,NMD_transcript_variant	MODIFIER	-	-	2.35	0.127645	CDON (rs60929339)	1	CEU
rs199804227	11:126028374-126028375	TTTTTTTTTTTTTTTT	intron_variant,NMD_transcript_variant	MODIFIER	-	-	-	-	CDON (rs60929339)	1	CEU
rs199804227	11:126028374-126028375	TTTTTTTTTTTTTTTTTTTT	intron_variant,NMD_transcript_variant	MODIFIER	-	-	-	-	CDON (rs60929339)	1	CEU
rs199804227	11:126028374-126028375	TTTTTTTTT	regulatory_region_variant	MODIFIER	-	-	1.234	-0.016671	CDON (rs60929339)	1	CEU
rs199804227	11:126028374-126028375	TTTTTTTTTTT	regulatory_region_variant	MODIFIER	-	-	2.403	0.133054	CDON (rs60929339)	1	CEU
rs199804227	11:126028374-126028375	TTTTTTTTTTTT	regulatory_region_variant	MODIFIER	-	-	2.35	0.127645	CDON (rs60929339)	1	CEU
rs199804227	11:126028374-126028375	TTTTTTTTTTTTTTTT	regulatory_region_variant	MODIFIER	-	-	-	-	CDON (rs60929339)	1	CEU
rs199804227	11:126028374-126028375	TTTTTTTTTTTTTTTTTTTT	regulatory_region_variant	MODIFIER	-	-	-	-	CDON (rs60929339)	1	CEU
rs11824101	11:126028425-126028425	G	intron_variant	MODIFIER	-	-	0.798	-0.108051	CDON (rs60929339)	1	CEU
rs11824101	11:126028425-126028425	G	intron_variant	MODIFIER	-	-	0.798	-0.108051	CDON (rs60929339)	1	CEU
rs11824101	11:126028425-126028425	G	intron_variant,non_coding_transcript_variant	MODIFIER	-	-	0.798	-0.108051	CDON (rs60929339)	1	CEU
rs11824101	11:126028425-126028425	G	intron_variant	MODIFIER	-	-	0.798	-0.108051	CDON (rs60929339)	1	CEU
rs11824101	11:126028425-126028425	G	intron_variant,non_coding_transcript_variant	MODIFIER	-	-	0.798	-0.108051	CDON (rs60929339)	1	CEU
rs11824101	11:126028425-126028425	G	intron_variant,non_coding_transcript_variant	MODIFIER	-	-	0.798	-0.108051	CDON (rs60929339)	1	CEU
rs11824101	11:126028425-126028425	G	intron_variant,non_coding_transcript_variant	MODIFIER	-	-	0.798	-0.108051	CDON (rs60929339)	1	CEU
rs11824101	11:126028425-126028425	G	intron_variant,NMD_transcript_variant	MODIFIER	-	-	0.798	-0.108051	CDON (rs60929339)	1	CEU
rs11824101	11:126028425-126028425	G	intron_variant	MODIFIER	-	-	0.798	-0.108051	CDON (rs60929339)	1	CEU
rs11824101	11:126028425-126028425	G	intron_variant,non_coding_transcript_variant	MODIFIER	-	-	0.798	-0.108051	CDON (rs60929339)	1	CEU
rs11824101	11:126028425-126028425	G	intron_variant,NMD_transcript_variant	MODIFIER	-	-	0.798	-0.108051	CDON (rs60929339)	1	CEU
rs77501467	11:126031340-126031340	C	intron_variant	MODIFIER	-	-	4.169	0.289677	CDON (rs60929339)	1	CEU
rs77501467	11:126031340-126031340	C	intron_variant	MODIFIER	-	-	4.169	0.289677	CDON (rs60929339)	1	CEU
rs77501467	11:126031340-126031340	C	intron_variant,non_coding_transcript_variant	MODIFIER	-	-	4.169	0.289677	CDON (rs60929339)	1	CEU
rs77501467	11:126031340-126031340	C	intron_variant	MODIFIER	-	-	4.169	0.289677	CDON (rs60929339)	1	CEU
rs77501467	11:126031340-126031340	C	intron_variant,non_coding_transcript_variant	MODIFIER	-	-	4.169	0.289677	CDON (rs60929339)	1	CEU
rs77501467	11:126031340-126031340	C	intron_variant,non_coding_transcript_variant	MODIFIER	-	-	4.169	0.289677	CDON (rs60929339)	1	CEU
rs77501467	11:126031340-126031340	C	intron_variant,non_coding_transcript_variant	MODIFIER	-	-	4.169	0.289677	CDON (rs60929339)	1	CEU
rs77501467	11:126031340-126031340	C	intron_variant,NMD_transcript_variant	MODIFIER	-	-	4.169	0.289677	CDON (rs60929339)	1	CEU
rs77501467	11:126031340-126031340	C	intron_variant	MODIFIER	-	-	4.169	0.289677	CDON (rs60929339)	1	CEU
rs77501467	11:126031340-126031340	C	intron_variant,non_coding_transcript_variant	MODIFIER	-	-	4.169	0.289677	CDON (rs60929339)	1	CEU
rs77501467	11:126031340-126031340	C	intron_variant,NMD_transcript_variant	MODIFIER	-	-	4.169	0.289677	CDON (rs60929339)	1	CEU
rs79574306	11:126031353-126031353	C	intron_variant	MODIFIER	-	-	2.593	0.151633	CDON (rs60929339)	1	CEU
rs79574306	11:126031353-126031353	C	intron_variant	MODIFIER	-	-	2.593	0.151633	CDON (rs60929339)	1	CEU
rs79574306	11:126031353-126031353	C	intron_variant,non_coding_transcript_variant	MODIFIER	-	-	2.593	0.151633	CDON (rs60929339)	1	CEU
rs79574306	11:126031353-126031353	C	intron_variant	MODIFIER	-	-	2.593	0.151633	CDON (rs60929339)	1	CEU
rs79574306	11:126031353-126031353	C	intron_variant,non_coding_transcript_variant	MODIFIER	-	-	2.593	0.151633	CDON (rs60929339)	1	CEU
rs79574306	11:126031353-126031353	C	intron_variant,non_coding_transcript_variant	MODIFIER	-	-	2.593	0.151633	CDON (rs60929339)	1	CEU
rs79574306	11:126031353-126031353	C	intron_variant,non_coding_transcript_variant	MODIFIER	-	-	2.593	0.151633	CDON (rs60929339)	1	CEU
rs79574306	11:126031353-126031353	C	intron_variant,NMD_transcript_variant	MODIFIER	-	-	2.593	0.151633	CDON (rs60929339)	1	CEU
rs79574306	11:126031353-126031353	C	intron_variant	MODIFIER	-	-	2.593	0.151633	CDON (rs60929339)	1	CEU
rs79574306	11:126031353-126031353	C	intron_variant,non_coding_transcript_variant	MODIFIER	-	-	2.593	0.151633	CDON (rs60929339)	1	CEU
rs79574306	11:126031353-126031353	C	intron_variant,NMD_transcript_variant	MODIFIER	-	-	2.593	0.151633	CDON (rs60929339)	1	CEU
rs79864933	11:126034685-126034685	C	intron_variant	MODIFIER	-	-	4.262	0.297674	CDON (rs60929339)	0.76	CEU
rs79864933	11:126034685-126034685	C	intron_variant	MODIFIER	-	-	4.262	0.297674	CDON (rs60929339)	0.76	CEU
rs79864933	11:126034685-126034685	C	intron_variant,non_coding_transcript_variant	MODIFIER	-	-	4.262	0.297674	CDON (rs60929339)	0.76	CEU
rs79864933	11:126034685-126034685	C	intron_variant	MODIFIER	-	-	4.262	0.297674	CDON (rs60929339)	0.76	CEU
rs79864933	11:126034685-126034685	C	intron_variant,non_coding_transcript_variant	MODIFIER	-	-	4.262	0.297674	CDON (rs60929339)	0.76	CEU
rs79864933	11:126034685-126034685	C	intron_variant,non_coding_transcript_variant	MODIFIER	-	-	4.262	0.297674	CDON (rs60929339)	0.76	CEU
rs79864933	11:126034685-126034685	C	intron_variant,non_coding_transcript_variant	MODIFIER	-	-	4.262	0.297674	CDON (rs60929339)	0.76	CEU
rs79864933	11:126034685-126034685	C	intron_variant,NMD_transcript_variant	MODIFIER	-	-	4.262	0.297674	CDON (rs60929339)	0.76	CEU
rs79864933	11:126034685-126034685	C	intron_variant	MODIFIER	-	-	4.262	0.297674	CDON (rs60929339)	0.76	CEU
rs79864933	11:126034685-126034685	C	intron_variant,non_coding_transcript_variant	MODIFIER	-	-	4.262	0.297674	CDON (rs60929339)	0.76	CEU
rs79864933	11:126034685-126034685	C	intron_variant,NMD_transcript_variant	MODIFIER	-	-	4.262	0.297674	CDON (rs60929339)	0.76	CEU
rs79864933	11:126034685-126034685	C	regulatory_region_variant	MODIFIER	-	-	4.262	0.297674	CDON (rs60929339)	0.76	CEU
rs7925962	11:126036225-126036225	G	intron_variant	MODIFIER	-	-	8.439	0.698293	CDON (rs60929339)	0.76	CEU
rs7925962	11:126036225-126036225	G	intron_variant	MODIFIER	-	-	8.439	0.698293	CDON (rs60929339)	0.76	CEU
rs7925962	11:126036225-126036225	G	intron_variant,non_coding_transcript_variant	MODIFIER	-	-	8.439	0.698293	CDON (rs60929339)	0.76	CEU
rs7925962	11:126036225-126036225	G	intron_variant	MODIFIER	-	-	8.439	0.698293	CDON (rs60929339)	0.76	CEU
rs7925962	11:126036225-126036225	G	intron_variant,non_coding_transcript_variant	MODIFIER	-	-	8.439	0.698293	CDON (rs60929339)	0.76	CEU
rs7925962	11:126036225-126036225	G	intron_variant,non_coding_transcript_variant	MODIFIER	-	-	8.439	0.698293	CDON (rs60929339)	0.76	CEU
rs7925962	11:126036225-126036225	G	intron_variant,non_coding_transcript_variant	MODIFIER	-	-	8.439	0.698293	CDON (rs60929339)	0.76	CEU
rs7925962	11:126036225-126036225	G	intron_variant,NMD_transcript_variant	MODIFIER	-	-	8.439	0.698293	CDON (rs60929339)	0.76	CEU
rs7925962	11:126036225-126036225	G	intron_variant	MODIFIER	-	-	8.439	0.698293	CDON (rs60929339)	0.76	CEU
rs7925962	11:126036225-126036225	G	intron_variant,non_coding_transcript_variant	MODIFIER	-	-	8.439	0.698293	CDON (rs60929339)	0.76	CEU
rs7925962	11:126036225-126036225	G	intron_variant,NMD_transcript_variant	MODIFIER	-	-	8.439	0.698293	CDON (rs60929339)	0.76	CEU
rs78196034	11:126021811-126021811	C	intron_variant	MODIFIER	-	-	0.796	-0.108634	CDON (rs3740909)	0.918	CEU
rs78196034	11:126021811-126021811	C	intron_variant	MODIFIER	-	-	0.796	-0.108634	CDON (rs3740909)	0.918	CEU
rs78196034	11:126021811-126021811	C	intron_variant,non_coding_transcript_variant	MODIFIER	-	-	0.796	-0.108634	CDON (rs3740909)	0.918	CEU
rs78196034	11:126021811-126021811	C	intron_variant	MODIFIER	-	-	0.796	-0.108634	CDON (rs3740909)	0.918	CEU
rs78196034	11:126021811-126021811	C	upstream_gene_variant	MODIFIER	-	-	0.796	-0.108634	CDON (rs3740909)	0.918	CEU
rs78196034	11:126021811-126021811	C	intron_variant,non_coding_transcript_variant	MODIFIER	-	-	0.796	-0.108634	CDON (rs3740909)	0.918	CEU
rs78196034	11:126021811-126021811	C	intron_variant,non_coding_transcript_variant	MODIFIER	-	-	0.796	-0.108634	CDON (rs3740909)	0.918	CEU
rs78196034	11:126021811-126021811	C	intron_variant,non_coding_transcript_variant	MODIFIER	-	-	0.796	-0.108634	CDON (rs3740909)	0.918	CEU
rs78196034	11:126021811-126021811	C	intron_variant,NMD_transcript_variant	MODIFIER	-	-	0.796	-0.108634	CDON (rs3740909)	0.918	CEU
rs78196034	11:126021811-126021811	C	intron_variant	MODIFIER	-	-	0.796	-0.108634	CDON (rs3740909)	0.918	CEU
rs78196034	11:126021811-126021811	C	non_coding_transcript_exon_variant	MODIFIER	-	-	0.796	-0.108634	CDON (rs3740909)	0.918	CEU
rs78196034	11:126021811-126021811	C	intron_variant,non_coding_transcript_variant	MODIFIER	-	-	0.796	-0.108634	CDON (rs3740909)	0.918	CEU
rs78196034	11:126021811-126021811	C	intron_variant,NMD_transcript_variant	MODIFIER	-	-	0.796	-0.108634	CDON (rs3740909)	0.918	CEU
rs1939890	11:126023380-126023380	G	intron_variant	MODIFIER	-	-	0.128	-0.484375	CDON (rs3740909)	0.361	CEU
rs1939890	11:126023380-126023380	T	intron_variant	MODIFIER	-	-	0.173	-0.421936	CDON (rs3740909)	0.361	CEU
rs1939890	11:126023380-126023380	G	intron_variant	MODIFIER	-	-	0.128	-0.484375	CDON (rs3740909)	0.361	CEU
rs1939890	11:126023380-126023380	T	intron_variant	MODIFIER	-	-	0.173	-0.421936	CDON (rs3740909)	0.361	CEU
rs1939890	11:126023380-126023380	G	intron_variant,non_coding_transcript_variant	MODIFIER	-	-	0.128	-0.484375	CDON (rs3740909)	0.361	CEU
rs1939890	11:126023380-126023380	T	intron_variant,non_coding_transcript_variant	MODIFIER	-	-	0.173	-0.421936	CDON (rs3740909)	0.361	CEU
rs1939890	11:126023380-126023380	G	intron_variant	MODIFIER	-	-	0.128	-0.484375	CDON (rs3740909)	0.361	CEU
rs1939890	11:126023380-126023380	T	intron_variant	MODIFIER	-	-	0.173	-0.421936	CDON (rs3740909)	0.361	CEU
rs1939890	11:126023380-126023380	G	upstream_gene_variant	MODIFIER	-	-	0.128	-0.484375	CDON (rs3740909)	0.361	CEU
rs1939890	11:126023380-126023380	T	upstream_gene_variant	MODIFIER	-	-	0.173	-0.421936	CDON (rs3740909)	0.361	CEU
rs1939890	11:126023380-126023380	G	intron_variant,non_coding_transcript_variant	MODIFIER	-	-	0.128	-0.484375	CDON (rs3740909)	0.361	CEU
rs1939890	11:126023380-126023380	T	intron_variant,non_coding_transcript_variant	MODIFIER	-	-	0.173	-0.421936	CDON (rs3740909)	0.361	CEU
rs1939890	11:126023380-126023380	G	intron_variant,non_coding_transcript_variant	MODIFIER	-	-	0.128	-0.484375	CDON (rs3740909)	0.361	CEU
rs1939890	11:126023380-126023380	T	intron_variant,non_coding_transcript_variant	MODIFIER	-	-	0.173	-0.421936	CDON (rs3740909)	0.361	CEU
rs1939890	11:126023380-126023380	G	intron_variant,non_coding_transcript_variant	MODIFIER	-	-	0.128	-0.484375	CDON (rs3740909)	0.361	CEU
rs1939890	11:126023380-126023380	T	intron_variant,non_coding_transcript_variant	MODIFIER	-	-	0.173	-0.421936	CDON (rs3740909)	0.361	CEU
rs1939890	11:126023380-126023380	G	intron_variant,NMD_transcript_variant	MODIFIER	-	-	0.128	-0.484375	CDON (rs3740909)	0.361	CEU
rs1939890	11:126023380-126023380	T	intron_variant,NMD_transcript_variant	MODIFIER	-	-	0.173	-0.421936	CDON (rs3740909)	0.361	CEU
rs1939890	11:126023380-126023380	G	intron_variant	MODIFIER	-	-	0.128	-0.484375	CDON (rs3740909)	0.361	CEU
rs1939890	11:126023380-126023380	T	intron_variant	MODIFIER	-	-	0.173	-0.421936	CDON (rs3740909)	0.361	CEU
rs1939890	11:126023380-126023380	G	upstream_gene_variant	MODIFIER	-	-	0.128	-0.484375	CDON (rs3740909)	0.361	CEU
rs1939890	11:126023380-126023380	T	upstream_gene_variant	MODIFIER	-	-	0.173	-0.421936	CDON (rs3740909)	0.361	CEU
rs1939890	11:126023380-126023380	G	intron_variant,non_coding_transcript_variant	MODIFIER	-	-	0.128	-0.484375	CDON (rs3740909)	0.361	CEU
rs1939890	11:126023380-126023380	T	intron_variant,non_coding_transcript_variant	MODIFIER	-	-	0.173	-0.421936	CDON (rs3740909)	0.361	CEU
rs1939890	11:126023380-126023380	G	intron_variant,NMD_transcript_variant	MODIFIER	-	-	0.128	-0.484375	CDON (rs3740909)	0.361	CEU
rs1939890	11:126023380-126023380	T	intron_variant,NMD_transcript_variant	MODIFIER	-	-	0.173	-0.421936	CDON (rs3740909)	0.361	CEU
rs148655219	11:126024583-126024587	G	intron_variant	MODIFIER	-	-	1.58	0.036341	CDON (rs3740909)	0.918	CEU
rs148655219	11:126024583-126024587	G	intron_variant	MODIFIER	-	-	1.58	0.036341	CDON (rs3740909)	0.918	CEU
rs148655219	11:126024583-126024587	G	intron_variant,non_coding_transcript_variant	MODIFIER	-	-	1.58	0.036341	CDON (rs3740909)	0.918	CEU
rs148655219	11:126024583-126024587	G	intron_variant	MODIFIER	-	-	1.58	0.036341	CDON (rs3740909)	0.918	CEU
rs148655219	11:126024583-126024587	G	upstream_gene_variant	MODIFIER	-	-	1.58	0.036341	CDON (rs3740909)	0.918	CEU
rs148655219	11:126024583-126024587	G	intron_variant,non_coding_transcript_variant	MODIFIER	-	-	1.58	0.036341	CDON (rs3740909)	0.918	CEU
rs148655219	11:126024583-126024587	G	intron_variant,non_coding_transcript_variant	MODIFIER	-	-	1.58	0.036341	CDON (rs3740909)	0.918	CEU
rs148655219	11:126024583-126024587	G	intron_variant,non_coding_transcript_variant	MODIFIER	-	-	1.58	0.036341	CDON (rs3740909)	0.918	CEU
rs148655219	11:126024583-126024587	G	intron_variant,NMD_transcript_variant	MODIFIER	-	-	1.58	0.036341	CDON (rs3740909)	0.918	CEU
rs148655219	11:126024583-126024587	G	intron_variant	MODIFIER	-	-	1.58	0.036341	CDON (rs3740909)	0.918	CEU
rs148655219	11:126024583-126024587	G	upstream_gene_variant	MODIFIER	-	-	1.58	0.036341	CDON (rs3740909)	0.918	CEU
rs148655219	11:126024583-126024587	G	intron_variant,non_coding_transcript_variant	MODIFIER	-	-	1.58	0.036341	CDON (rs3740909)	0.918	CEU
rs148655219	11:126024583-126024587	G	intron_variant,NMD_transcript_variant	MODIFIER	-	-	1.58	0.036341	CDON (rs3740909)	0.918	CEU
rs76038012	11:126026206-126026206	C	intron_variant	MODIFIER	-	-	3.109	0.198712	CDON (rs3740909)	0.918	CEU
rs76038012	11:126026206-126026206	C	intron_variant	MODIFIER	-	-	3.109	0.198712	CDON (rs3740909)	0.918	CEU
rs76038012	11:126026206-126026206	C	intron_variant,non_coding_transcript_variant	MODIFIER	-	-	3.109	0.198712	CDON (rs3740909)	0.918	CEU
rs76038012	11:126026206-126026206	C	intron_variant	MODIFIER	-	-	3.109	0.198712	CDON (rs3740909)	0.918	CEU
rs76038012	11:126026206-126026206	C	upstream_gene_variant	MODIFIER	-	-	3.109	0.198712	CDON (rs3740909)	0.918	CEU
rs76038012	11:126026206-126026206	C	intron_variant,non_coding_transcript_variant	MODIFIER	-	-	3.109	0.198712	CDON (rs3740909)	0.918	CEU
rs76038012	11:126026206-126026206	C	intron_variant,non_coding_transcript_variant	MODIFIER	-	-	3.109	0.198712	CDON (rs3740909)	0.918	CEU
rs76038012	11:126026206-126026206	C	intron_variant,non_coding_transcript_variant	MODIFIER	-	-	3.109	0.198712	CDON (rs3740909)	0.918	CEU
rs76038012	11:126026206-126026206	C	intron_variant,NMD_transcript_variant	MODIFIER	-	-	3.109	0.198712	CDON (rs3740909)	0.918	CEU
rs76038012	11:126026206-126026206	C	intron_variant	MODIFIER	-	-	3.109	0.198712	CDON (rs3740909)	0.918	CEU
rs76038012	11:126026206-126026206	C	upstream_gene_variant	MODIFIER	-	-	3.109	0.198712	CDON (rs3740909)	0.918	CEU
rs76038012	11:126026206-126026206	C	intron_variant,non_coding_transcript_variant	MODIFIER	-	-	3.109	0.198712	CDON (rs3740909)	0.918	CEU
rs76038012	11:126026206-126026206	C	intron_variant,NMD_transcript_variant	MODIFIER	-	-	3.109	0.198712	CDON (rs3740909)	0.918	CEU
rs7935585	11:126026470-126026470	C	intron_variant	MODIFIER	-	-	0.049	-0.679654	CDON (rs3740909)	0.918	CEU
rs7935585	11:126026470-126026470	C	intron_variant	MODIFIER	-	-	0.049	-0.679654	CDON (rs3740909)	0.918	CEU
rs7935585	11:126026470-126026470	C	intron_variant,non_coding_transcript_variant	MODIFIER	-	-	0.049	-0.679654	CDON (rs3740909)	0.918	CEU
rs7935585	11:126026470-126026470	C	intron_variant	MODIFIER	-	-	0.049	-0.679654	CDON (rs3740909)	0.918	CEU
rs7935585	11:126026470-126026470	C	upstream_gene_variant	MODIFIER	-	-	0.049	-0.679654	CDON (rs3740909)	0.918	CEU
rs7935585	11:126026470-126026470	C	intron_variant,non_coding_transcript_variant	MODIFIER	-	-	0.049	-0.679654	CDON (rs3740909)	0.918	CEU
rs7935585	11:126026470-126026470	C	intron_variant,non_coding_transcript_variant	MODIFIER	-	-	0.049	-0.679654	CDON (rs3740909)	0.918	CEU
rs7935585	11:126026470-126026470	C	intron_variant,non_coding_transcript_variant	MODIFIER	-	-	0.049	-0.679654	CDON (rs3740909)	0.918	CEU
rs7935585	11:126026470-126026470	C	intron_variant,NMD_transcript_variant	MODIFIER	-	-	0.049	-0.679654	CDON (rs3740909)	0.918	CEU
rs7935585	11:126026470-126026470	C	intron_variant	MODIFIER	-	-	0.049	-0.679654	CDON (rs3740909)	0.918	CEU
rs7935585	11:126026470-126026470	C	upstream_gene_variant	MODIFIER	-	-	0.049	-0.679654	CDON (rs3740909)	0.918	CEU
rs7935585	11:126026470-126026470	C	intron_variant,non_coding_transcript_variant	MODIFIER	-	-	0.049	-0.679654	CDON (rs3740909)	0.918	CEU
rs7935585	11:126026470-126026470	C	intron_variant,NMD_transcript_variant	MODIFIER	-	-	0.049	-0.679654	CDON (rs3740909)	0.918	CEU
rs79068099	11:126027313-126027313	T	intron_variant	MODIFIER	-	-	9.098	0.769904	CDON (rs3740909)	0.918	CEU
rs79068099	11:126027313-126027313	T	intron_variant	MODIFIER	-	-	9.098	0.769904	CDON (rs3740909)	0.918	CEU
rs79068099	11:126027313-126027313	T	intron_variant,non_coding_transcript_variant	MODIFIER	-	-	9.098	0.769904	CDON (rs3740909)	0.918	CEU
rs79068099	11:126027313-126027313	T	intron_variant	MODIFIER	-	-	9.098	0.769904	CDON (rs3740909)	0.918	CEU
rs79068099	11:126027313-126027313	T	intron_variant,non_coding_transcript_variant	MODIFIER	-	-	9.098	0.769904	CDON (rs3740909)	0.918	CEU
rs79068099	11:126027313-126027313	T	intron_variant,non_coding_transcript_variant	MODIFIER	-	-	9.098	0.769904	CDON (rs3740909)	0.918	CEU
rs79068099	11:126027313-126027313	T	intron_variant,non_coding_transcript_variant	MODIFIER	-	-	9.098	0.769904	CDON (rs3740909)	0.918	CEU
rs79068099	11:126027313-126027313	T	intron_variant,NMD_transcript_variant	MODIFIER	-	-	9.098	0.769904	CDON (rs3740909)	0.918	CEU
rs79068099	11:126027313-126027313	T	intron_variant	MODIFIER	-	-	9.098	0.769904	CDON (rs3740909)	0.918	CEU
rs79068099	11:126027313-126027313	T	intron_variant,non_coding_transcript_variant	MODIFIER	-	-	9.098	0.769904	CDON (rs3740909)	0.918	CEU
rs79068099	11:126027313-126027313	T	intron_variant,NMD_transcript_variant	MODIFIER	-	-	9.098	0.769904	CDON (rs3740909)	0.918	CEU
rs79206156	11:126027394-126027394	G	intron_variant	MODIFIER	-	-	0.243	-0.35133	CDON (rs3740909)	0.918	CEU
rs79206156	11:126027394-126027394	G	intron_variant	MODIFIER	-	-	0.243	-0.35133	CDON (rs3740909)	0.918	CEU
rs79206156	11:126027394-126027394	G	intron_variant,non_coding_transcript_variant	MODIFIER	-	-	0.243	-0.35133	CDON (rs3740909)	0.918	CEU
rs79206156	11:126027394-126027394	G	intron_variant	MODIFIER	-	-	0.243	-0.35133	CDON (rs3740909)	0.918	CEU
rs79206156	11:126027394-126027394	G	intron_variant,non_coding_transcript_variant	MODIFIER	-	-	0.243	-0.35133	CDON (rs3740909)	0.918	CEU
rs79206156	11:126027394-126027394	G	intron_variant,non_coding_transcript_variant	MODIFIER	-	-	0.243	-0.35133	CDON (rs3740909)	0.918	CEU
rs79206156	11:126027394-126027394	G	intron_variant,non_coding_transcript_variant	MODIFIER	-	-	0.243	-0.35133	CDON (rs3740909)	0.918	CEU
rs79206156	11:126027394-126027394	G	intron_variant,NMD_transcript_variant	MODIFIER	-	-	0.243	-0.35133	CDON (rs3740909)	0.918	CEU
rs79206156	11:126027394-126027394	G	intron_variant	MODIFIER	-	-	0.243	-0.35133	CDON (rs3740909)	0.918	CEU
rs79206156	11:126027394-126027394	G	intron_variant,non_coding_transcript_variant	MODIFIER	-	-	0.243	-0.35133	CDON (rs3740909)	0.918	CEU
rs79206156	11:126027394-126027394	G	intron_variant,NMD_transcript_variant	MODIFIER	-	-	0.243	-0.35133	CDON (rs3740909)	0.918	CEU
rs79290599	11:126027528-126027528	G	intron_variant	MODIFIER	-	-	1.015	-0.057639	CDON (rs3740909)	0.918	CEU
rs79290599	11:126027528-126027528	G	intron_variant	MODIFIER	-	-	1.015	-0.057639	CDON (rs3740909)	0.918	CEU
rs79290599	11:126027528-126027528	G	intron_variant,non_coding_transcript_variant	MODIFIER	-	-	1.015	-0.057639	CDON (rs3740909)	0.918	CEU
rs79290599	11:126027528-126027528	G	intron_variant	MODIFIER	-	-	1.015	-0.057639	CDON (rs3740909)	0.918	CEU
rs79290599	11:126027528-126027528	G	intron_variant,non_coding_transcript_variant	MODIFIER	-	-	1.015	-0.057639	CDON (rs3740909)	0.918	CEU
rs79290599	11:126027528-126027528	G	intron_variant,non_coding_transcript_variant	MODIFIER	-	-	1.015	-0.057639	CDON (rs3740909)	0.918	CEU
rs79290599	11:126027528-126027528	G	intron_variant,non_coding_transcript_variant	MODIFIER	-	-	1.015	-0.057639	CDON (rs3740909)	0.918	CEU
rs79290599	11:126027528-126027528	G	intron_variant,NMD_transcript_variant	MODIFIER	-	-	1.015	-0.057639	CDON (rs3740909)	0.918	CEU
rs79290599	11:126027528-126027528	G	intron_variant	MODIFIER	-	-	1.015	-0.057639	CDON (rs3740909)	0.918	CEU
rs79290599	11:126027528-126027528	G	intron_variant,non_coding_transcript_variant	MODIFIER	-	-	1.015	-0.057639	CDON (rs3740909)	0.918	CEU
rs79290599	11:126027528-126027528	G	intron_variant,NMD_transcript_variant	MODIFIER	-	-	1.015	-0.057639	CDON (rs3740909)	0.918	CEU
rs59717599	11:126027792-126027792	C	intron_variant	MODIFIER	-	-	1.4	0.010149	CDON (rs3740909)	0.918	CEU
rs59717599	11:126027792-126027792	T	intron_variant	MODIFIER	-	-	1.323	-0.002009	CDON (rs3740909)	0.918	CEU
rs59717599	11:126027792-126027792	C	intron_variant	MODIFIER	-	-	1.4	0.010149	CDON (rs3740909)	0.918	CEU
rs59717599	11:126027792-126027792	T	intron_variant	MODIFIER	-	-	1.323	-0.002009	CDON (rs3740909)	0.918	CEU
rs59717599	11:126027792-126027792	C	intron_variant,non_coding_transcript_variant	MODIFIER	-	-	1.4	0.010149	CDON (rs3740909)	0.918	CEU
rs59717599	11:126027792-126027792	T	intron_variant,non_coding_transcript_variant	MODIFIER	-	-	1.323	-0.002009	CDON (rs3740909)	0.918	CEU
rs59717599	11:126027792-126027792	C	intron_variant	MODIFIER	-	-	1.4	0.010149	CDON (rs3740909)	0.918	CEU
rs59717599	11:126027792-126027792	T	intron_variant	MODIFIER	-	-	1.323	-0.002009	CDON (rs3740909)	0.918	CEU
rs59717599	11:126027792-126027792	C	intron_variant,non_coding_transcript_variant	MODIFIER	-	-	1.4	0.010149	CDON (rs3740909)	0.918	CEU
rs59717599	11:126027792-126027792	T	intron_variant,non_coding_transcript_variant	MODIFIER	-	-	1.323	-0.002009	CDON (rs3740909)	0.918	CEU
rs59717599	11:126027792-126027792	C	intron_variant,non_coding_transcript_variant	MODIFIER	-	-	1.4	0.010149	CDON (rs3740909)	0.918	CEU
rs59717599	11:126027792-126027792	T	intron_variant,non_coding_transcript_variant	MODIFIER	-	-	1.323	-0.002009	CDON (rs3740909)	0.918	CEU
rs59717599	11:126027792-126027792	C	intron_variant,non_coding_transcript_variant	MODIFIER	-	-	1.4	0.010149	CDON (rs3740909)	0.918	CEU
rs59717599	11:126027792-126027792	T	intron_variant,non_coding_transcript_variant	MODIFIER	-	-	1.323	-0.002009	CDON (rs3740909)	0.918	CEU
rs59717599	11:126027792-126027792	C	intron_variant,NMD_transcript_variant	MODIFIER	-	-	1.4	0.010149	CDON (rs3740909)	0.918	CEU
rs59717599	11:126027792-126027792	T	intron_variant,NMD_transcript_variant	MODIFIER	-	-	1.323	-0.002009	CDON (rs3740909)	0.918	CEU
rs59717599	11:126027792-126027792	C	intron_variant	MODIFIER	-	-	1.4	0.010149	CDON (rs3740909)	0.918	CEU
rs59717599	11:126027792-126027792	T	intron_variant	MODIFIER	-	-	1.323	-0.002009	CDON (rs3740909)	0.918	CEU
rs59717599	11:126027792-126027792	C	intron_variant,non_coding_transcript_variant	MODIFIER	-	-	1.4	0.010149	CDON (rs3740909)	0.918	CEU
rs59717599	11:126027792-126027792	T	intron_variant,non_coding_transcript_variant	MODIFIER	-	-	1.323	-0.002009	CDON (rs3740909)	0.918	CEU
rs59717599	11:126027792-126027792	C	intron_variant,NMD_transcript_variant	MODIFIER	-	-	1.4	0.010149	CDON (rs3740909)	0.918	CEU
rs59717599	11:126027792-126027792	T	intron_variant,NMD_transcript_variant	MODIFIER	-	-	1.323	-0.002009	CDON (rs3740909)	0.918	CEU
rs60929339	11:126027945-126027945	C	intron_variant	MODIFIER	-	-	7.805	0.630467	CDON (rs3740909)	0.918	CEU
rs60929339	11:126027945-126027945	C	intron_variant	MODIFIER	-	-	7.805	0.630467	CDON (rs3740909)	0.918	CEU
rs60929339	11:126027945-126027945	C	intron_variant,non_coding_transcript_variant	MODIFIER	-	-	7.805	0.630467	CDON (rs3740909)	0.918	CEU
rs60929339	11:126027945-126027945	C	intron_variant	MODIFIER	-	-	7.805	0.630467	CDON (rs3740909)	0.918	CEU
rs60929339	11:126027945-126027945	C	intron_variant,non_coding_transcript_variant	MODIFIER	-	-	7.805	0.630467	CDON (rs3740909)	0.918	CEU
rs60929339	11:126027945-126027945	C	intron_variant,non_coding_transcript_variant	MODIFIER	-	-	7.805	0.630467	CDON (rs3740909)	0.918	CEU
rs60929339	11:126027945-126027945	C	intron_variant,non_coding_transcript_variant	MODIFIER	-	-	7.805	0.630467	CDON (rs3740909)	0.918	CEU
rs60929339	11:126027945-126027945	C	intron_variant,NMD_transcript_variant	MODIFIER	-	-	7.805	0.630467	CDON (rs3740909)	0.918	CEU
rs60929339	11:126027945-126027945	C	intron_variant	MODIFIER	-	-	7.805	0.630467	CDON (rs3740909)	0.918	CEU
rs60929339	11:126027945-126027945	C	intron_variant,non_coding_transcript_variant	MODIFIER	-	-	7.805	0.630467	CDON (rs3740909)	0.918	CEU
rs60929339	11:126027945-126027945	C	intron_variant,NMD_transcript_variant	MODIFIER	-	-	7.805	0.630467	CDON (rs3740909)	0.918	CEU
rs199804227	11:126028374-126028375	TTTTTTTTT	intron_variant	MODIFIER	-	-	1.234	-0.016671	CDON (rs3740909)	0.918	CEU
rs199804227	11:126028374-126028375	TTTTTTTTTTT	intron_variant	MODIFIER	-	-	2.403	0.133054	CDON (rs3740909)	0.918	CEU
rs199804227	11:126028374-126028375	TTTTTTTTTTTT	intron_variant	MODIFIER	-	-	2.35	0.127645	CDON (rs3740909)	0.918	CEU
rs199804227	11:126028374-126028375	TTTTTTTTTTTTTTTT	intron_variant	MODIFIER	-	-	-	-	CDON (rs3740909)	0.918	CEU
rs199804227	11:126028374-126028375	TTTTTTTTTTTTTTTTTTTT	intron_variant	MODIFIER	-	-	-	-	CDON (rs3740909)	0.918	CEU
rs199804227	11:126028374-126028375	TTTTTTTTT	intron_variant	MODIFIER	-	-	1.234	-0.016671	CDON (rs3740909)	0.918	CEU
rs199804227	11:126028374-126028375	TTTTTTTTTTT	intron_variant	MODIFIER	-	-	2.403	0.133054	CDON (rs3740909)	0.918	CEU
rs199804227	11:126028374-126028375	TTTTTTTTTTTT	intron_variant	MODIFIER	-	-	2.35	0.127645	CDON (rs3740909)	0.918	CEU
rs199804227	11:126028374-126028375	TTTTTTTTTTTTTTTT	intron_variant	MODIFIER	-	-	-	-	CDON (rs3740909)	0.918	CEU
rs199804227	11:126028374-126028375	TTTTTTTTTTTTTTTTTTTT	intron_variant	MODIFIER	-	-	-	-	CDON (rs3740909)	0.918	CEU
rs199804227	11:126028374-126028375	TTTTTTTTT	intron_variant,non_coding_transcript_variant	MODIFIER	-	-	1.234	-0.016671	CDON (rs3740909)	0.918	CEU
rs199804227	11:126028374-126028375	TTTTTTTTTTT	intron_variant,non_coding_transcript_variant	MODIFIER	-	-	2.403	0.133054	CDON (rs3740909)	0.918	CEU
rs199804227	11:126028374-126028375	TTTTTTTTTTTT	intron_variant,non_coding_transcript_variant	MODIFIER	-	-	2.35	0.127645	CDON (rs3740909)	0.918	CEU
rs199804227	11:126028374-126028375	TTTTTTTTTTTTTTTT	intron_variant,non_coding_transcript_variant	MODIFIER	-	-	-	-	CDON (rs3740909)	0.918	CEU
rs199804227	11:126028374-126028375	TTTTTTTTTTTTTTTTTTTT	intron_variant,non_coding_transcript_variant	MODIFIER	-	-	-	-	CDON (rs3740909)	0.918	CEU
rs199804227	11:126028374-126028375	TTTTTTTTT	intron_variant	MODIFIER	-	-	1.234	-0.016671	CDON (rs3740909)	0.918	CEU
rs199804227	11:126028374-126028375	TTTTTTTTTTT	intron_variant	MODIFIER	-	-	2.403	0.133054	CDON (rs3740909)	0.918	CEU
rs199804227	11:126028374-126028375	TTTTTTTTTTTT	intron_variant	MODIFIER	-	-	2.35	0.127645	CDON (rs3740909)	0.918	CEU
rs199804227	11:126028374-126028375	TTTTTTTTTTTTTTTT	intron_variant	MODIFIER	-	-	-	-	CDON (rs3740909)	0.918	CEU
rs199804227	11:126028374-126028375	TTTTTTTTTTTTTTTTTTTT	intron_variant	MODIFIER	-	-	-	-	CDON (rs3740909)	0.918	CEU
rs199804227	11:126028374-126028375	TTTTTTTTT	intron_variant,non_coding_transcript_variant	MODIFIER	-	-	1.234	-0.016671	CDON (rs3740909)	0.918	CEU
rs199804227	11:126028374-126028375	TTTTTTTTTTT	intron_variant,non_coding_transcript_variant	MODIFIER	-	-	2.403	0.133054	CDON (rs3740909)	0.918	CEU
rs199804227	11:126028374-126028375	TTTTTTTTTTTT	intron_variant,non_coding_transcript_variant	MODIFIER	-	-	2.35	0.127645	CDON (rs3740909)	0.918	CEU
rs199804227	11:126028374-126028375	TTTTTTTTTTTTTTTT	intron_variant,non_coding_transcript_variant	MODIFIER	-	-	-	-	CDON (rs3740909)	0.918	CEU
rs199804227	11:126028374-126028375	TTTTTTTTTTTTTTTTTTTT	intron_variant,non_coding_transcript_variant	MODIFIER	-	-	-	-	CDON (rs3740909)	0.918	CEU
rs199804227	11:126028374-126028375	TTTTTTTTT	intron_variant,non_coding_transcript_variant	MODIFIER	-	-	1.234	-0.016671	CDON (rs3740909)	0.918	CEU
rs199804227	11:126028374-126028375	TTTTTTTTTTT	intron_variant,non_coding_transcript_variant	MODIFIER	-	-	2.403	0.133054	CDON (rs3740909)	0.918	CEU
rs199804227	11:126028374-126028375	TTTTTTTTTTTT	intron_variant,non_coding_transcript_variant	MODIFIER	-	-	2.35	0.127645	CDON (rs3740909)	0.918	CEU
rs199804227	11:126028374-126028375	TTTTTTTTTTTTTTTT	intron_variant,non_coding_transcript_variant	MODIFIER	-	-	-	-	CDON (rs3740909)	0.918	CEU
rs199804227	11:126028374-126028375	TTTTTTTTTTTTTTTTTTTT	intron_variant,non_coding_transcript_variant	MODIFIER	-	-	-	-	CDON (rs3740909)	0.918	CEU
rs199804227	11:126028374-126028375	TTTTTTTTT	intron_variant,non_coding_transcript_variant	MODIFIER	-	-	1.234	-0.016671	CDON (rs3740909)	0.918	CEU
rs199804227	11:126028374-126028375	TTTTTTTTTTT	intron_variant,non_coding_transcript_variant	MODIFIER	-	-	2.403	0.133054	CDON (rs3740909)	0.918	CEU
rs199804227	11:126028374-126028375	TTTTTTTTTTTT	intron_variant,non_coding_transcript_variant	MODIFIER	-	-	2.35	0.127645	CDON (rs3740909)	0.918	CEU
rs199804227	11:126028374-126028375	TTTTTTTTTTTTTTTT	intron_variant,non_coding_transcript_variant	MODIFIER	-	-	-	-	CDON (rs3740909)	0.918	CEU
rs199804227	11:126028374-126028375	TTTTTTTTTTTTTTTTTTTT	intron_variant,non_coding_transcript_variant	MODIFIER	-	-	-	-	CDON (rs3740909)	0.918	CEU
rs199804227	11:126028374-126028375	TTTTTTTTT	intron_variant,NMD_transcript_variant	MODIFIER	-	-	1.234	-0.016671	CDON (rs3740909)	0.918	CEU
rs199804227	11:126028374-126028375	TTTTTTTTTTT	intron_variant,NMD_transcript_variant	MODIFIER	-	-	2.403	0.133054	CDON (rs3740909)	0.918	CEU
rs199804227	11:126028374-126028375	TTTTTTTTTTTT	intron_variant,NMD_transcript_variant	MODIFIER	-	-	2.35	0.127645	CDON (rs3740909)	0.918	CEU
rs199804227	11:126028374-126028375	TTTTTTTTTTTTTTTT	intron_variant,NMD_transcript_variant	MODIFIER	-	-	-	-	CDON (rs3740909)	0.918	CEU
rs199804227	11:126028374-126028375	TTTTTTTTTTTTTTTTTTTT	intron_variant,NMD_transcript_variant	MODIFIER	-	-	-	-	CDON (rs3740909)	0.918	CEU
rs199804227	11:126028374-126028375	TTTTTTTTT	intron_variant	MODIFIER	-	-	1.234	-0.016671	CDON (rs3740909)	0.918	CEU
rs199804227	11:126028374-126028375	TTTTTTTTTTT	intron_variant	MODIFIER	-	-	2.403	0.133054	CDON (rs3740909)	0.918	CEU
rs199804227	11:126028374-126028375	TTTTTTTTTTTT	intron_variant	MODIFIER	-	-	2.35	0.127645	CDON (rs3740909)	0.918	CEU
rs199804227	11:126028374-126028375	TTTTTTTTTTTTTTTT	intron_variant	MODIFIER	-	-	-	-	CDON (rs3740909)	0.918	CEU
rs199804227	11:126028374-126028375	TTTTTTTTTTTTTTTTTTTT	intron_variant	MODIFIER	-	-	-	-	CDON (rs3740909)	0.918	CEU
rs199804227	11:126028374-126028375	TTTTTTTTT	intron_variant,non_coding_transcript_variant	MODIFIER	-	-	1.234	-0.016671	CDON (rs3740909)	0.918	CEU
rs199804227	11:126028374-126028375	TTTTTTTTTTT	intron_variant,non_coding_transcript_variant	MODIFIER	-	-	2.403	0.133054	CDON (rs3740909)	0.918	CEU
rs199804227	11:126028374-126028375	TTTTTTTTTTTT	intron_variant,non_coding_transcript_variant	MODIFIER	-	-	2.35	0.127645	CDON (rs3740909)	0.918	CEU
rs199804227	11:126028374-126028375	TTTTTTTTTTTTTTTT	intron_variant,non_coding_transcript_variant	MODIFIER	-	-	-	-	CDON (rs3740909)	0.918	CEU
rs199804227	11:126028374-126028375	TTTTTTTTTTTTTTTTTTTT	intron_variant,non_coding_transcript_variant	MODIFIER	-	-	-	-	CDON (rs3740909)	0.918	CEU
rs199804227	11:126028374-126028375	TTTTTTTTT	intron_variant,NMD_transcript_variant	MODIFIER	-	-	1.234	-0.016671	CDON (rs3740909)	0.918	CEU
rs199804227	11:126028374-126028375	TTTTTTTTTTT	intron_variant,NMD_transcript_variant	MODIFIER	-	-	2.403	0.133054	CDON (rs3740909)	0.918	CEU
rs199804227	11:126028374-126028375	TTTTTTTTTTTT	intron_variant,NMD_transcript_variant	MODIFIER	-	-	2.35	0.127645	CDON (rs3740909)	0.918	CEU
rs199804227	11:126028374-126028375	TTTTTTTTTTTTTTTT	intron_variant,NMD_transcript_variant	MODIFIER	-	-	-	-	CDON (rs3740909)	0.918	CEU
rs199804227	11:126028374-126028375	TTTTTTTTTTTTTTTTTTTT	intron_variant,NMD_transcript_variant	MODIFIER	-	-	-	-	CDON (rs3740909)	0.918	CEU
rs199804227	11:126028374-126028375	TTTTTTTTT	regulatory_region_variant	MODIFIER	-	-	1.234	-0.016671	CDON (rs3740909)	0.918	CEU
rs199804227	11:126028374-126028375	TTTTTTTTTTT	regulatory_region_variant	MODIFIER	-	-	2.403	0.133054	CDON (rs3740909)	0.918	CEU
rs199804227	11:126028374-126028375	TTTTTTTTTTTT	regulatory_region_variant	MODIFIER	-	-	2.35	0.127645	CDON (rs3740909)	0.918	CEU
rs199804227	11:126028374-126028375	TTTTTTTTTTTTTTTT	regulatory_region_variant	MODIFIER	-	-	-	-	CDON (rs3740909)	0.918	CEU
rs199804227	11:126028374-126028375	TTTTTTTTTTTTTTTTTTTT	regulatory_region_variant	MODIFIER	-	-	-	-	CDON (rs3740909)	0.918	CEU
rs11824101	11:126028425-126028425	G	intron_variant	MODIFIER	-	-	0.798	-0.108051	CDON (rs3740909)	0.918	CEU
rs11824101	11:126028425-126028425	G	intron_variant	MODIFIER	-	-	0.798	-0.108051	CDON (rs3740909)	0.918	CEU
rs11824101	11:126028425-126028425	G	intron_variant,non_coding_transcript_variant	MODIFIER	-	-	0.798	-0.108051	CDON (rs3740909)	0.918	CEU
rs11824101	11:126028425-126028425	G	intron_variant	MODIFIER	-	-	0.798	-0.108051	CDON (rs3740909)	0.918	CEU
rs11824101	11:126028425-126028425	G	intron_variant,non_coding_transcript_variant	MODIFIER	-	-	0.798	-0.108051	CDON (rs3740909)	0.918	CEU
rs11824101	11:126028425-126028425	G	intron_variant,non_coding_transcript_variant	MODIFIER	-	-	0.798	-0.108051	CDON (rs3740909)	0.918	CEU
rs11824101	11:126028425-126028425	G	intron_variant,non_coding_transcript_variant	MODIFIER	-	-	0.798	-0.108051	CDON (rs3740909)	0.918	CEU
rs11824101	11:126028425-126028425	G	intron_variant,NMD_transcript_variant	MODIFIER	-	-	0.798	-0.108051	CDON (rs3740909)	0.918	CEU
rs11824101	11:126028425-126028425	G	intron_variant	MODIFIER	-	-	0.798	-0.108051	CDON (rs3740909)	0.918	CEU
rs11824101	11:126028425-126028425	G	intron_variant,non_coding_transcript_variant	MODIFIER	-	-	0.798	-0.108051	CDON (rs3740909)	0.918	CEU
rs11824101	11:126028425-126028425	G	intron_variant,NMD_transcript_variant	MODIFIER	-	-	0.798	-0.108051	CDON (rs3740909)	0.918	CEU
rs2305949	4:55114289-55114289	A	intron_variant	MODIFIER	-	-	1.067	-0.047168	KDR (rs2305948)	0.408	CEU
rs2305949	4:55114289-55114289	T	intron_variant	MODIFIER	-	-	2.348	0.127406	KDR (rs2305948)	0.408	CEU
rs2305949	4:55114289-55114289	A	intron_variant,non_coding_transcript_variant	MODIFIER	-	-	1.067	-0.047168	KDR (rs2305948)	0.408	CEU
rs2305949	4:55114289-55114289	T	intron_variant,non_coding_transcript_variant	MODIFIER	-	-	2.348	0.127406	KDR (rs2305948)	0.408	CEU
rs2305949	4:55114289-55114289	A	intron_variant,non_coding_transcript_variant	MODIFIER	-	-	1.067	-0.047168	KDR (rs2305948)	0.408	CEU
rs2305949	4:55114289-55114289	T	intron_variant,non_coding_transcript_variant	MODIFIER	-	-	2.348	0.127406	KDR (rs2305948)	0.408	CEU
rs34945396	4:55116617-55116617	A	intron_variant	MODIFIER	-	-	3.259	0.211785	KDR (rs2305948)	0.395	CEU
rs34945396	4:55116617-55116617	C	intron_variant	MODIFIER	-	-	3.824	0.260199	KDR (rs2305948)	0.395	CEU
rs34945396	4:55116617-55116617	A	intron_variant,non_coding_transcript_variant	MODIFIER	-	-	3.259	0.211785	KDR (rs2305948)	0.395	CEU
rs34945396	4:55116617-55116617	C	intron_variant,non_coding_transcript_variant	MODIFIER	-	-	3.824	0.260199	KDR (rs2305948)	0.395	CEU
rs34945396	4:55116617-55116617	A	intron_variant,non_coding_transcript_variant	MODIFIER	-	-	3.259	0.211785	KDR (rs2305948)	0.395	CEU
rs34945396	4:55116617-55116617	C	intron_variant,non_coding_transcript_variant	MODIFIER	-	-	3.824	0.260199	KDR (rs2305948)	0.395	CEU
rs34945396	4:55116617-55116617	A	regulatory_region_variant	MODIFIER	-	-	3.259	0.211785	KDR (rs2305948)	0.395	CEU
rs34945396	4:55116617-55116617	C	regulatory_region_variant	MODIFIER	-	-	3.824	0.260199	KDR (rs2305948)	0.395	CEU
rs592229	6:31962664-31962664	A	intron_variant	MODIFIER	-	-	1.502	0.025387	C4A C4B (rs2280774)	0.383	CEU
rs592229	6:31962664-31962664	C	intron_variant	MODIFIER	-	-	1.062	-0.048264	C4A C4B (rs2280774)	0.383	CEU
rs592229	6:31962664-31962664	T	intron_variant	MODIFIER	-	-	0.899	-0.083044	C4A C4B (rs2280774)	0.383	CEU
rs592229	6:31962664-31962664	A	upstream_gene_variant	MODIFIER	-	-	1.502	0.025387	C4A C4B (rs2280774)	0.383	CEU
rs592229	6:31962664-31962664	C	upstream_gene_variant	MODIFIER	-	-	1.062	-0.048264	C4A C4B (rs2280774)	0.383	CEU
rs592229	6:31962664-31962664	T	upstream_gene_variant	MODIFIER	-	-	0.899	-0.083044	C4A C4B (rs2280774)	0.383	CEU
rs592229	6:31962664-31962664	A	upstream_gene_variant	MODIFIER	-	-	1.502	0.025387	C4A C4B (rs2280774)	0.383	CEU
rs592229	6:31962664-31962664	C	upstream_gene_variant	MODIFIER	-	-	1.062	-0.048264	C4A C4B (rs2280774)	0.383	CEU
rs592229	6:31962664-31962664	T	upstream_gene_variant	MODIFIER	-	-	0.899	-0.083044	C4A C4B (rs2280774)	0.383	CEU
rs592229	6:31962664-31962664	A	upstream_gene_variant	MODIFIER	-	-	1.502	0.025387	C4A C4B (rs2280774)	0.383	CEU
rs592229	6:31962664-31962664	C	upstream_gene_variant	MODIFIER	-	-	1.062	-0.048264	C4A C4B (rs2280774)	0.383	CEU
rs592229	6:31962664-31962664	T	upstream_gene_variant	MODIFIER	-	-	0.899	-0.083044	C4A C4B (rs2280774)	0.383	CEU
rs592229	6:31962664-31962664	A	upstream_gene_variant	MODIFIER	-	-	1.502	0.025387	C4A C4B (rs2280774)	0.383	CEU
rs592229	6:31962664-31962664	C	upstream_gene_variant	MODIFIER	-	-	1.062	-0.048264	C4A C4B (rs2280774)	0.383	CEU
rs592229	6:31962664-31962664	T	upstream_gene_variant	MODIFIER	-	-	0.899	-0.083044	C4A C4B (rs2280774)	0.383	CEU
rs592229	6:31962664-31962664	A	upstream_gene_variant	MODIFIER	-	-	1.502	0.025387	C4A C4B (rs2280774)	0.383	CEU
rs592229	6:31962664-31962664	C	upstream_gene_variant	MODIFIER	-	-	1.062	-0.048264	C4A C4B (rs2280774)	0.383	CEU
rs592229	6:31962664-31962664	T	upstream_gene_variant	MODIFIER	-	-	0.899	-0.083044	C4A C4B (rs2280774)	0.383	CEU
rs592229	6:31962664-31962664	A	upstream_gene_variant	MODIFIER	-	-	1.502	0.025387	C4A C4B (rs2280774)	0.383	CEU
rs592229	6:31962664-31962664	C	upstream_gene_variant	MODIFIER	-	-	1.062	-0.048264	C4A C4B (rs2280774)	0.383	CEU
rs592229	6:31962664-31962664	T	upstream_gene_variant	MODIFIER	-	-	0.899	-0.083044	C4A C4B (rs2280774)	0.383	CEU
rs592229	6:31962664-31962664	A	upstream_gene_variant	MODIFIER	-	-	1.502	0.025387	C4A C4B (rs2280774)	0.383	CEU
rs592229	6:31962664-31962664	C	upstream_gene_variant	MODIFIER	-	-	1.062	-0.048264	C4A C4B (rs2280774)	0.383	CEU
rs592229	6:31962664-31962664	T	upstream_gene_variant	MODIFIER	-	-	0.899	-0.083044	C4A C4B (rs2280774)	0.383	CEU
rs592229	6:31962664-31962664	A	intron_variant,NMD_transcript_variant	MODIFIER	-	-	1.502	0.025387	C4A C4B (rs2280774)	0.383	CEU
rs592229	6:31962664-31962664	C	intron_variant,NMD_transcript_variant	MODIFIER	-	-	1.062	-0.048264	C4A C4B (rs2280774)	0.383	CEU
rs592229	6:31962664-31962664	T	intron_variant,NMD_transcript_variant	MODIFIER	-	-	0.899	-0.083044	C4A C4B (rs2280774)	0.383	CEU
rs592229	6:31962664-31962664	A	upstream_gene_variant	MODIFIER	-	-	1.502	0.025387	C4A C4B (rs2280774)	0.383	CEU
rs592229	6:31962664-31962664	C	upstream_gene_variant	MODIFIER	-	-	1.062	-0.048264	C4A C4B (rs2280774)	0.383	CEU
rs592229	6:31962664-31962664	T	upstream_gene_variant	MODIFIER	-	-	0.899	-0.083044	C4A C4B (rs2280774)	0.383	CEU
rs592229	6:31962664-31962664	A	intron_variant,non_coding_transcript_variant	MODIFIER	-	-	1.502	0.025387	C4A C4B (rs2280774)	0.383	CEU
rs592229	6:31962664-31962664	C	intron_variant,non_coding_transcript_variant	MODIFIER	-	-	1.062	-0.048264	C4A C4B (rs2280774)	0.383	CEU
rs592229	6:31962664-31962664	T	intron_variant,non_coding_transcript_variant	MODIFIER	-	-	0.899	-0.083044	C4A C4B (rs2280774)	0.383	CEU
rs592229	6:31962664-31962664	A	intron_variant,non_coding_transcript_variant	MODIFIER	-	-	1.502	0.025387	C4A C4B (rs2280774)	0.383	CEU
rs592229	6:31962664-31962664	C	intron_variant,non_coding_transcript_variant	MODIFIER	-	-	1.062	-0.048264	C4A C4B (rs2280774)	0.383	CEU
rs592229	6:31962664-31962664	T	intron_variant,non_coding_transcript_variant	MODIFIER	-	-	0.899	-0.083044	C4A C4B (rs2280774)	0.383	CEU
rs592229	6:31962664-31962664	A	intron_variant,NMD_transcript_variant	MODIFIER	-	-	1.502	0.025387	C4A C4B (rs2280774)	0.383	CEU
rs592229	6:31962664-31962664	C	intron_variant,NMD_transcript_variant	MODIFIER	-	-	1.062	-0.048264	C4A C4B (rs2280774)	0.383	CEU
rs592229	6:31962664-31962664	T	intron_variant,NMD_transcript_variant	MODIFIER	-	-	0.899	-0.083044	C4A C4B (rs2280774)	0.383	CEU
rs592229	6:31962664-31962664	A	upstream_gene_variant	MODIFIER	-	-	1.502	0.025387	C4A C4B (rs2280774)	0.383	CEU
rs592229	6:31962664-31962664	C	upstream_gene_variant	MODIFIER	-	-	1.062	-0.048264	C4A C4B (rs2280774)	0.383	CEU
rs592229	6:31962664-31962664	T	upstream_gene_variant	MODIFIER	-	-	0.899	-0.083044	C4A C4B (rs2280774)	0.383	CEU
rs592229	6:31962664-31962664	A	upstream_gene_variant	MODIFIER	-	-	1.502	0.025387	C4A C4B (rs2280774)	0.383	CEU
rs592229	6:31962664-31962664	C	upstream_gene_variant	MODIFIER	-	-	1.062	-0.048264	C4A C4B (rs2280774)	0.383	CEU
rs592229	6:31962664-31962664	T	upstream_gene_variant	MODIFIER	-	-	0.899	-0.083044	C4A C4B (rs2280774)	0.383	CEU
rs592229	6:31962664-31962664	A	upstream_gene_variant	MODIFIER	-	-	1.502	0.025387	C4A C4B (rs2280774)	0.383	CEU
rs592229	6:31962664-31962664	C	upstream_gene_variant	MODIFIER	-	-	1.062	-0.048264	C4A C4B (rs2280774)	0.383	CEU
rs592229	6:31962664-31962664	T	upstream_gene_variant	MODIFIER	-	-	0.899	-0.083044	C4A C4B (rs2280774)	0.383	CEU
rs592229	6:31962664-31962664	A	downstream_gene_variant	MODIFIER	-	-	1.502	0.025387	C4A C4B (rs2280774)	0.383	CEU
rs592229	6:31962664-31962664	C	downstream_gene_variant	MODIFIER	-	-	1.062	-0.048264	C4A C4B (rs2280774)	0.383	CEU
rs592229	6:31962664-31962664	T	downstream_gene_variant	MODIFIER	-	-	0.899	-0.083044	C4A C4B (rs2280774)	0.383	CEU
rs592229	6:31962664-31962664	A	upstream_gene_variant	MODIFIER	-	-	1.502	0.025387	C4A C4B (rs2280774)	0.383	CEU
rs592229	6:31962664-31962664	C	upstream_gene_variant	MODIFIER	-	-	1.062	-0.048264	C4A C4B (rs2280774)	0.383	CEU
rs592229	6:31962664-31962664	T	upstream_gene_variant	MODIFIER	-	-	0.899	-0.083044	C4A C4B (rs2280774)	0.383	CEU
rs592229	6:31962664-31962664	A	upstream_gene_variant	MODIFIER	-	-	1.502	0.025387	C4A C4B (rs2280774)	0.383	CEU
rs592229	6:31962664-31962664	C	upstream_gene_variant	MODIFIER	-	-	1.062	-0.048264	C4A C4B (rs2280774)	0.383	CEU
rs592229	6:31962664-31962664	T	upstream_gene_variant	MODIFIER	-	-	0.899	-0.083044	C4A C4B (rs2280774)	0.383	CEU
rs592229	6:31962664-31962664	A	upstream_gene_variant	MODIFIER	-	-	1.502	0.025387	C4A C4B (rs2280774)	0.383	CEU
rs592229	6:31962664-31962664	C	upstream_gene_variant	MODIFIER	-	-	1.062	-0.048264	C4A C4B (rs2280774)	0.383	CEU
rs592229	6:31962664-31962664	T	upstream_gene_variant	MODIFIER	-	-	0.899	-0.083044	C4A C4B (rs2280774)	0.383	CEU
rs592229	6:31962664-31962664	A	downstream_gene_variant	MODIFIER	-	-	1.502	0.025387	C4A C4B (rs2280774)	0.383	CEU
rs592229	6:31962664-31962664	C	downstream_gene_variant	MODIFIER	-	-	1.062	-0.048264	C4A C4B (rs2280774)	0.383	CEU
rs592229	6:31962664-31962664	T	downstream_gene_variant	MODIFIER	-	-	0.899	-0.083044	C4A C4B (rs2280774)	0.383	CEU
rs592229	6:31962664-31962664	A	upstream_gene_variant	MODIFIER	-	-	1.502	0.025387	C4A C4B (rs2280774)	0.383	CEU
rs592229	6:31962664-31962664	C	upstream_gene_variant	MODIFIER	-	-	1.062	-0.048264	C4A C4B (rs2280774)	0.383	CEU
rs592229	6:31962664-31962664	T	upstream_gene_variant	MODIFIER	-	-	0.899	-0.083044	C4A C4B (rs2280774)	0.383	CEU
rs592229	6:31962664-31962664	A	upstream_gene_variant	MODIFIER	-	-	1.502	0.025387	C4A C4B (rs2280774)	0.383	CEU
rs592229	6:31962664-31962664	C	upstream_gene_variant	MODIFIER	-	-	1.062	-0.048264	C4A C4B (rs2280774)	0.383	CEU
rs592229	6:31962664-31962664	T	upstream_gene_variant	MODIFIER	-	-	0.899	-0.083044	C4A C4B (rs2280774)	0.383	CEU
rs592229	6:31962664-31962664	A	upstream_gene_variant	MODIFIER	-	-	1.502	0.025387	C4A C4B (rs2280774)	0.383	CEU
rs592229	6:31962664-31962664	C	upstream_gene_variant	MODIFIER	-	-	1.062	-0.048264	C4A C4B (rs2280774)	0.383	CEU
rs592229	6:31962664-31962664	T	upstream_gene_variant	MODIFIER	-	-	0.899	-0.083044	C4A C4B (rs2280774)	0.383	CEU
rs592229	6:31962664-31962664	A	downstream_gene_variant	MODIFIER	-	-	1.502	0.025387	C4A C4B (rs2280774)	0.383	CEU
rs592229	6:31962664-31962664	C	downstream_gene_variant	MODIFIER	-	-	1.062	-0.048264	C4A C4B (rs2280774)	0.383	CEU
rs592229	6:31962664-31962664	T	downstream_gene_variant	MODIFIER	-	-	0.899	-0.083044	C4A C4B (rs2280774)	0.383	CEU
rs592229	CHR_HSCHR6_MHC_COX_CTG1:31950210-31950210	A	upstream_gene_variant	MODIFIER	-	-	-	-	C4A C4B (rs2280774)	0.383	CEU
rs592229	CHR_HSCHR6_MHC_COX_CTG1:31950210-31950210	C	upstream_gene_variant	MODIFIER	-	-	-	-	C4A C4B (rs2280774)	0.383	CEU
rs592229	CHR_HSCHR6_MHC_COX_CTG1:31950210-31950210	T	upstream_gene_variant	MODIFIER	-	-	-	-	C4A C4B (rs2280774)	0.383	CEU
rs592229	CHR_HSCHR6_MHC_COX_CTG1:31950210-31950210	A	upstream_gene_variant	MODIFIER	-	-	-	-	C4A C4B (rs2280774)	0.383	CEU
rs592229	CHR_HSCHR6_MHC_COX_CTG1:31950210-31950210	C	upstream_gene_variant	MODIFIER	-	-	-	-	C4A C4B (rs2280774)	0.383	CEU
rs592229	CHR_HSCHR6_MHC_COX_CTG1:31950210-31950210	T	upstream_gene_variant	MODIFIER	-	-	-	-	C4A C4B (rs2280774)	0.383	CEU
rs592229	CHR_HSCHR6_MHC_COX_CTG1:31950210-31950210	A	upstream_gene_variant	MODIFIER	-	-	-	-	C4A C4B (rs2280774)	0.383	CEU
rs592229	CHR_HSCHR6_MHC_COX_CTG1:31950210-31950210	C	upstream_gene_variant	MODIFIER	-	-	-	-	C4A C4B (rs2280774)	0.383	CEU
rs592229	CHR_HSCHR6_MHC_COX_CTG1:31950210-31950210	T	upstream_gene_variant	MODIFIER	-	-	-	-	C4A C4B (rs2280774)	0.383	CEU
rs592229	CHR_HSCHR6_MHC_COX_CTG1:31950210-31950210	A	upstream_gene_variant	MODIFIER	-	-	-	-	C4A C4B (rs2280774)	0.383	CEU
rs592229	CHR_HSCHR6_MHC_COX_CTG1:31950210-31950210	C	upstream_gene_variant	MODIFIER	-	-	-	-	C4A C4B (rs2280774)	0.383	CEU
rs592229	CHR_HSCHR6_MHC_COX_CTG1:31950210-31950210	T	upstream_gene_variant	MODIFIER	-	-	-	-	C4A C4B (rs2280774)	0.383	CEU
rs592229	CHR_HSCHR6_MHC_COX_CTG1:31950210-31950210	A	upstream_gene_variant	MODIFIER	-	-	-	-	C4A C4B (rs2280774)	0.383	CEU
rs592229	CHR_HSCHR6_MHC_COX_CTG1:31950210-31950210	C	upstream_gene_variant	MODIFIER	-	-	-	-	C4A C4B (rs2280774)	0.383	CEU
rs592229	CHR_HSCHR6_MHC_COX_CTG1:31950210-31950210	T	upstream_gene_variant	MODIFIER	-	-	-	-	C4A C4B (rs2280774)	0.383	CEU
rs592229	CHR_HSCHR6_MHC_COX_CTG1:31950210-31950210	A	intron_variant	MODIFIER	-	-	-	-	C4A C4B (rs2280774)	0.383	CEU
rs592229	CHR_HSCHR6_MHC_COX_CTG1:31950210-31950210	C	intron_variant	MODIFIER	-	-	-	-	C4A C4B (rs2280774)	0.383	CEU
rs592229	CHR_HSCHR6_MHC_COX_CTG1:31950210-31950210	T	intron_variant	MODIFIER	-	-	-	-	C4A C4B (rs2280774)	0.383	CEU
rs592229	CHR_HSCHR6_MHC_COX_CTG1:31950210-31950210	A	upstream_gene_variant	MODIFIER	-	-	-	-	C4A C4B (rs2280774)	0.383	CEU
rs592229	CHR_HSCHR6_MHC_COX_CTG1:31950210-31950210	C	upstream_gene_variant	MODIFIER	-	-	-	-	C4A C4B (rs2280774)	0.383	CEU
rs592229	CHR_HSCHR6_MHC_COX_CTG1:31950210-31950210	T	upstream_gene_variant	MODIFIER	-	-	-	-	C4A C4B (rs2280774)	0.383	CEU
rs592229	CHR_HSCHR6_MHC_COX_CTG1:31950210-31950210	A	upstream_gene_variant	MODIFIER	-	-	-	-	C4A C4B (rs2280774)	0.383	CEU
rs592229	CHR_HSCHR6_MHC_COX_CTG1:31950210-31950210	C	upstream_gene_variant	MODIFIER	-	-	-	-	C4A C4B (rs2280774)	0.383	CEU
rs592229	CHR_HSCHR6_MHC_COX_CTG1:31950210-31950210	T	upstream_gene_variant	MODIFIER	-	-	-	-	C4A C4B (rs2280774)	0.383	CEU
rs592229	CHR_HSCHR6_MHC_COX_CTG1:31950210-31950210	A	upstream_gene_variant	MODIFIER	-	-	-	-	C4A C4B (rs2280774)	0.383	CEU
rs592229	CHR_HSCHR6_MHC_COX_CTG1:31950210-31950210	C	upstream_gene_variant	MODIFIER	-	-	-	-	C4A C4B (rs2280774)	0.383	CEU
rs592229	CHR_HSCHR6_MHC_COX_CTG1:31950210-31950210	T	upstream_gene_variant	MODIFIER	-	-	-	-	C4A C4B (rs2280774)	0.383	CEU
rs592229	CHR_HSCHR6_MHC_COX_CTG1:31950210-31950210	A	downstream_gene_variant	MODIFIER	-	-	-	-	C4A C4B (rs2280774)	0.383	CEU
rs592229	CHR_HSCHR6_MHC_COX_CTG1:31950210-31950210	C	downstream_gene_variant	MODIFIER	-	-	-	-	C4A C4B (rs2280774)	0.383	CEU
rs592229	CHR_HSCHR6_MHC_COX_CTG1:31950210-31950210	T	downstream_gene_variant	MODIFIER	-	-	-	-	C4A C4B (rs2280774)	0.383	CEU
rs592229	CHR_HSCHR6_MHC_COX_CTG1:31950210-31950210	A	upstream_gene_variant	MODIFIER	-	-	-	-	C4A C4B (rs2280774)	0.383	CEU
rs592229	CHR_HSCHR6_MHC_COX_CTG1:31950210-31950210	C	upstream_gene_variant	MODIFIER	-	-	-	-	C4A C4B (rs2280774)	0.383	CEU
rs592229	CHR_HSCHR6_MHC_COX_CTG1:31950210-31950210	T	upstream_gene_variant	MODIFIER	-	-	-	-	C4A C4B (rs2280774)	0.383	CEU
rs592229	CHR_HSCHR6_MHC_COX_CTG1:31950210-31950210	A	upstream_gene_variant	MODIFIER	-	-	-	-	C4A C4B (rs2280774)	0.383	CEU
rs592229	CHR_HSCHR6_MHC_COX_CTG1:31950210-31950210	C	upstream_gene_variant	MODIFIER	-	-	-	-	C4A C4B (rs2280774)	0.383	CEU
rs592229	CHR_HSCHR6_MHC_COX_CTG1:31950210-31950210	T	upstream_gene_variant	MODIFIER	-	-	-	-	C4A C4B (rs2280774)	0.383	CEU
rs592229	CHR_HSCHR6_MHC_COX_CTG1:31950210-31950210	A	upstream_gene_variant	MODIFIER	-	-	-	-	C4A C4B (rs2280774)	0.383	CEU
rs592229	CHR_HSCHR6_MHC_COX_CTG1:31950210-31950210	C	upstream_gene_variant	MODIFIER	-	-	-	-	C4A C4B (rs2280774)	0.383	CEU
rs592229	CHR_HSCHR6_MHC_COX_CTG1:31950210-31950210	T	upstream_gene_variant	MODIFIER	-	-	-	-	C4A C4B (rs2280774)	0.383	CEU
rs592229	CHR_HSCHR6_MHC_COX_CTG1:31950210-31950210	A	upstream_gene_variant	MODIFIER	-	-	-	-	C4A C4B (rs2280774)	0.383	CEU
rs592229	CHR_HSCHR6_MHC_COX_CTG1:31950210-31950210	C	upstream_gene_variant	MODIFIER	-	-	-	-	C4A C4B (rs2280774)	0.383	CEU
rs592229	CHR_HSCHR6_MHC_COX_CTG1:31950210-31950210	T	upstream_gene_variant	MODIFIER	-	-	-	-	C4A C4B (rs2280774)	0.383	CEU
rs592229	CHR_HSCHR6_MHC_COX_CTG1:31950210-31950210	A	intron_variant,non_coding_transcript_variant	MODIFIER	-	-	-	-	C4A C4B (rs2280774)	0.383	CEU
rs592229	CHR_HSCHR6_MHC_COX_CTG1:31950210-31950210	C	intron_variant,non_coding_transcript_variant	MODIFIER	-	-	-	-	C4A C4B (rs2280774)	0.383	CEU
rs592229	CHR_HSCHR6_MHC_COX_CTG1:31950210-31950210	T	intron_variant,non_coding_transcript_variant	MODIFIER	-	-	-	-	C4A C4B (rs2280774)	0.383	CEU
rs592229	CHR_HSCHR6_MHC_COX_CTG1:31950210-31950210	A	downstream_gene_variant	MODIFIER	-	-	-	-	C4A C4B (rs2280774)	0.383	CEU
rs592229	CHR_HSCHR6_MHC_COX_CTG1:31950210-31950210	C	downstream_gene_variant	MODIFIER	-	-	-	-	C4A C4B (rs2280774)	0.383	CEU
rs592229	CHR_HSCHR6_MHC_COX_CTG1:31950210-31950210	T	downstream_gene_variant	MODIFIER	-	-	-	-	C4A C4B (rs2280774)	0.383	CEU
rs592229	CHR_HSCHR6_MHC_COX_CTG1:31950210-31950210	A	downstream_gene_variant	MODIFIER	-	-	-	-	C4A C4B (rs2280774)	0.383	CEU
rs592229	CHR_HSCHR6_MHC_COX_CTG1:31950210-31950210	C	downstream_gene_variant	MODIFIER	-	-	-	-	C4A C4B (rs2280774)	0.383	CEU
rs592229	CHR_HSCHR6_MHC_COX_CTG1:31950210-31950210	T	downstream_gene_variant	MODIFIER	-	-	-	-	C4A C4B (rs2280774)	0.383	CEU
rs592229	CHR_HSCHR6_MHC_COX_CTG1:31950210-31950210	A	intron_variant,non_coding_transcript_variant	MODIFIER	-	-	-	-	C4A C4B (rs2280774)	0.383	CEU
rs592229	CHR_HSCHR6_MHC_COX_CTG1:31950210-31950210	C	intron_variant,non_coding_transcript_variant	MODIFIER	-	-	-	-	C4A C4B (rs2280774)	0.383	CEU
rs592229	CHR_HSCHR6_MHC_COX_CTG1:31950210-31950210	T	intron_variant,non_coding_transcript_variant	MODIFIER	-	-	-	-	C4A C4B (rs2280774)	0.383	CEU
rs592229	CHR_HSCHR6_MHC_COX_CTG1:31950210-31950210	A	upstream_gene_variant	MODIFIER	-	-	-	-	C4A C4B (rs2280774)	0.383	CEU
rs592229	CHR_HSCHR6_MHC_COX_CTG1:31950210-31950210	C	upstream_gene_variant	MODIFIER	-	-	-	-	C4A C4B (rs2280774)	0.383	CEU
rs592229	CHR_HSCHR6_MHC_COX_CTG1:31950210-31950210	T	upstream_gene_variant	MODIFIER	-	-	-	-	C4A C4B (rs2280774)	0.383	CEU
rs592229	CHR_HSCHR6_MHC_COX_CTG1:31950210-31950210	A	upstream_gene_variant	MODIFIER	-	-	-	-	C4A C4B (rs2280774)	0.383	CEU
rs592229	CHR_HSCHR6_MHC_COX_CTG1:31950210-31950210	C	upstream_gene_variant	MODIFIER	-	-	-	-	C4A C4B (rs2280774)	0.383	CEU
rs592229	CHR_HSCHR6_MHC_COX_CTG1:31950210-31950210	T	upstream_gene_variant	MODIFIER	-	-	-	-	C4A C4B (rs2280774)	0.383	CEU
rs592229	CHR_HSCHR6_MHC_COX_CTG1:31950210-31950210	A	downstream_gene_variant	MODIFIER	-	-	-	-	C4A C4B (rs2280774)	0.383	CEU
rs592229	CHR_HSCHR6_MHC_COX_CTG1:31950210-31950210	C	downstream_gene_variant	MODIFIER	-	-	-	-	C4A C4B (rs2280774)	0.383	CEU
rs592229	CHR_HSCHR6_MHC_COX_CTG1:31950210-31950210	T	downstream_gene_variant	MODIFIER	-	-	-	-	C4A C4B (rs2280774)	0.383	CEU
rs592229	CHR_HSCHR6_MHC_COX_CTG1:31950210-31950210	A	upstream_gene_variant	MODIFIER	-	-	-	-	C4A C4B (rs2280774)	0.383	CEU
rs592229	CHR_HSCHR6_MHC_COX_CTG1:31950210-31950210	C	upstream_gene_variant	MODIFIER	-	-	-	-	C4A C4B (rs2280774)	0.383	CEU
rs592229	CHR_HSCHR6_MHC_COX_CTG1:31950210-31950210	T	upstream_gene_variant	MODIFIER	-	-	-	-	C4A C4B (rs2280774)	0.383	CEU
rs592229	CHR_HSCHR6_MHC_DBB_CTG1:31944846-31944846	G	upstream_gene_variant	MODIFIER	-	-	-	-	C4A C4B (rs2280774)	0.383	CEU
rs592229	CHR_HSCHR6_MHC_DBB_CTG1:31944846-31944846	A	upstream_gene_variant	MODIFIER	-	-	-	-	C4A C4B (rs2280774)	0.383	CEU
rs592229	CHR_HSCHR6_MHC_DBB_CTG1:31944846-31944846	C	upstream_gene_variant	MODIFIER	-	-	-	-	C4A C4B (rs2280774)	0.383	CEU
rs592229	CHR_HSCHR6_MHC_DBB_CTG1:31944846-31944846	G	upstream_gene_variant	MODIFIER	-	-	-	-	C4A C4B (rs2280774)	0.383	CEU
rs592229	CHR_HSCHR6_MHC_DBB_CTG1:31944846-31944846	A	upstream_gene_variant	MODIFIER	-	-	-	-	C4A C4B (rs2280774)	0.383	CEU
rs592229	CHR_HSCHR6_MHC_DBB_CTG1:31944846-31944846	C	upstream_gene_variant	MODIFIER	-	-	-	-	C4A C4B (rs2280774)	0.383	CEU
rs592229	CHR_HSCHR6_MHC_DBB_CTG1:31944846-31944846	G	intron_variant	MODIFIER	-	-	-	-	C4A C4B (rs2280774)	0.383	CEU
rs592229	CHR_HSCHR6_MHC_DBB_CTG1:31944846-31944846	A	intron_variant	MODIFIER	-	-	-	-	C4A C4B (rs2280774)	0.383	CEU
rs592229	CHR_HSCHR6_MHC_DBB_CTG1:31944846-31944846	C	intron_variant	MODIFIER	-	-	-	-	C4A C4B (rs2280774)	0.383	CEU
rs592229	CHR_HSCHR6_MHC_DBB_CTG1:31944846-31944846	G	upstream_gene_variant	MODIFIER	-	-	-	-	C4A C4B (rs2280774)	0.383	CEU
rs592229	CHR_HSCHR6_MHC_DBB_CTG1:31944846-31944846	A	upstream_gene_variant	MODIFIER	-	-	-	-	C4A C4B (rs2280774)	0.383	CEU
rs592229	CHR_HSCHR6_MHC_DBB_CTG1:31944846-31944846	C	upstream_gene_variant	MODIFIER	-	-	-	-	C4A C4B (rs2280774)	0.383	CEU
rs592229	CHR_HSCHR6_MHC_DBB_CTG1:31944846-31944846	G	upstream_gene_variant	MODIFIER	-	-	-	-	C4A C4B (rs2280774)	0.383	CEU
rs592229	CHR_HSCHR6_MHC_DBB_CTG1:31944846-31944846	A	upstream_gene_variant	MODIFIER	-	-	-	-	C4A C4B (rs2280774)	0.383	CEU
rs592229	CHR_HSCHR6_MHC_DBB_CTG1:31944846-31944846	C	upstream_gene_variant	MODIFIER	-	-	-	-	C4A C4B (rs2280774)	0.383	CEU
rs592229	CHR_HSCHR6_MHC_DBB_CTG1:31944846-31944846	G	upstream_gene_variant	MODIFIER	-	-	-	-	C4A C4B (rs2280774)	0.383	CEU
rs592229	CHR_HSCHR6_MHC_DBB_CTG1:31944846-31944846	A	upstream_gene_variant	MODIFIER	-	-	-	-	C4A C4B (rs2280774)	0.383	CEU
rs592229	CHR_HSCHR6_MHC_DBB_CTG1:31944846-31944846	C	upstream_gene_variant	MODIFIER	-	-	-	-	C4A C4B (rs2280774)	0.383	CEU
rs592229	CHR_HSCHR6_MHC_DBB_CTG1:31944846-31944846	G	downstream_gene_variant	MODIFIER	-	-	-	-	C4A C4B (rs2280774)	0.383	CEU
rs592229	CHR_HSCHR6_MHC_DBB_CTG1:31944846-31944846	A	downstream_gene_variant	MODIFIER	-	-	-	-	C4A C4B (rs2280774)	0.383	CEU
rs592229	CHR_HSCHR6_MHC_DBB_CTG1:31944846-31944846	C	downstream_gene_variant	MODIFIER	-	-	-	-	C4A C4B (rs2280774)	0.383	CEU
rs592229	CHR_HSCHR6_MHC_DBB_CTG1:31944846-31944846	G	upstream_gene_variant	MODIFIER	-	-	-	-	C4A C4B (rs2280774)	0.383	CEU
rs592229	CHR_HSCHR6_MHC_DBB_CTG1:31944846-31944846	A	upstream_gene_variant	MODIFIER	-	-	-	-	C4A C4B (rs2280774)	0.383	CEU
rs592229	CHR_HSCHR6_MHC_DBB_CTG1:31944846-31944846	C	upstream_gene_variant	MODIFIER	-	-	-	-	C4A C4B (rs2280774)	0.383	CEU
rs592229	CHR_HSCHR6_MHC_DBB_CTG1:31944846-31944846	G	upstream_gene_variant	MODIFIER	-	-	-	-	C4A C4B (rs2280774)	0.383	CEU
rs592229	CHR_HSCHR6_MHC_DBB_CTG1:31944846-31944846	A	upstream_gene_variant	MODIFIER	-	-	-	-	C4A C4B (rs2280774)	0.383	CEU
rs592229	CHR_HSCHR6_MHC_DBB_CTG1:31944846-31944846	C	upstream_gene_variant	MODIFIER	-	-	-	-	C4A C4B (rs2280774)	0.383	CEU
rs592229	CHR_HSCHR6_MHC_DBB_CTG1:31944846-31944846	G	downstream_gene_variant	MODIFIER	-	-	-	-	C4A C4B (rs2280774)	0.383	CEU
rs592229	CHR_HSCHR6_MHC_DBB_CTG1:31944846-31944846	A	downstream_gene_variant	MODIFIER	-	-	-	-	C4A C4B (rs2280774)	0.383	CEU
rs592229	CHR_HSCHR6_MHC_DBB_CTG1:31944846-31944846	C	downstream_gene_variant	MODIFIER	-	-	-	-	C4A C4B (rs2280774)	0.383	CEU
rs592229	CHR_HSCHR6_MHC_DBB_CTG1:31944846-31944846	G	upstream_gene_variant	MODIFIER	-	-	-	-	C4A C4B (rs2280774)	0.383	CEU
rs592229	CHR_HSCHR6_MHC_DBB_CTG1:31944846-31944846	A	upstream_gene_variant	MODIFIER	-	-	-	-	C4A C4B (rs2280774)	0.383	CEU
rs592229	CHR_HSCHR6_MHC_DBB_CTG1:31944846-31944846	C	upstream_gene_variant	MODIFIER	-	-	-	-	C4A C4B (rs2280774)	0.383	CEU
rs592229	CHR_HSCHR6_MHC_DBB_CTG1:31944846-31944846	G	upstream_gene_variant	MODIFIER	-	-	-	-	C4A C4B (rs2280774)	0.383	CEU
rs592229	CHR_HSCHR6_MHC_DBB_CTG1:31944846-31944846	A	upstream_gene_variant	MODIFIER	-	-	-	-	C4A C4B (rs2280774)	0.383	CEU
rs592229	CHR_HSCHR6_MHC_DBB_CTG1:31944846-31944846	C	upstream_gene_variant	MODIFIER	-	-	-	-	C4A C4B (rs2280774)	0.383	CEU
rs592229	CHR_HSCHR6_MHC_DBB_CTG1:31944846-31944846	G	intron_variant,non_coding_transcript_variant	MODIFIER	-	-	-	-	C4A C4B (rs2280774)	0.383	CEU
rs592229	CHR_HSCHR6_MHC_DBB_CTG1:31944846-31944846	A	intron_variant,non_coding_transcript_variant	MODIFIER	-	-	-	-	C4A C4B (rs2280774)	0.383	CEU
rs592229	CHR_HSCHR6_MHC_DBB_CTG1:31944846-31944846	C	intron_variant,non_coding_transcript_variant	MODIFIER	-	-	-	-	C4A C4B (rs2280774)	0.383	CEU
rs592229	CHR_HSCHR6_MHC_DBB_CTG1:31944846-31944846	G	upstream_gene_variant	MODIFIER	-	-	-	-	C4A C4B (rs2280774)	0.383	CEU
rs592229	CHR_HSCHR6_MHC_DBB_CTG1:31944846-31944846	A	upstream_gene_variant	MODIFIER	-	-	-	-	C4A C4B (rs2280774)	0.383	CEU
rs592229	CHR_HSCHR6_MHC_DBB_CTG1:31944846-31944846	C	upstream_gene_variant	MODIFIER	-	-	-	-	C4A C4B (rs2280774)	0.383	CEU
rs592229	CHR_HSCHR6_MHC_DBB_CTG1:31944846-31944846	G	upstream_gene_variant	MODIFIER	-	-	-	-	C4A C4B (rs2280774)	0.383	CEU
rs592229	CHR_HSCHR6_MHC_DBB_CTG1:31944846-31944846	A	upstream_gene_variant	MODIFIER	-	-	-	-	C4A C4B (rs2280774)	0.383	CEU
rs592229	CHR_HSCHR6_MHC_DBB_CTG1:31944846-31944846	C	upstream_gene_variant	MODIFIER	-	-	-	-	C4A C4B (rs2280774)	0.383	CEU
rs592229	CHR_HSCHR6_MHC_DBB_CTG1:31944846-31944846	G	upstream_gene_variant	MODIFIER	-	-	-	-	C4A C4B (rs2280774)	0.383	CEU
rs592229	CHR_HSCHR6_MHC_DBB_CTG1:31944846-31944846	A	upstream_gene_variant	MODIFIER	-	-	-	-	C4A C4B (rs2280774)	0.383	CEU
rs592229	CHR_HSCHR6_MHC_DBB_CTG1:31944846-31944846	C	upstream_gene_variant	MODIFIER	-	-	-	-	C4A C4B (rs2280774)	0.383	CEU
rs592229	CHR_HSCHR6_MHC_DBB_CTG1:31944846-31944846	G	upstream_gene_variant	MODIFIER	-	-	-	-	C4A C4B (rs2280774)	0.383	CEU
rs592229	CHR_HSCHR6_MHC_DBB_CTG1:31944846-31944846	A	upstream_gene_variant	MODIFIER	-	-	-	-	C4A C4B (rs2280774)	0.383	CEU
rs592229	CHR_HSCHR6_MHC_DBB_CTG1:31944846-31944846	C	upstream_gene_variant	MODIFIER	-	-	-	-	C4A C4B (rs2280774)	0.383	CEU
rs592229	CHR_HSCHR6_MHC_DBB_CTG1:31944846-31944846	G	upstream_gene_variant	MODIFIER	-	-	-	-	C4A C4B (rs2280774)	0.383	CEU
rs592229	CHR_HSCHR6_MHC_DBB_CTG1:31944846-31944846	A	upstream_gene_variant	MODIFIER	-	-	-	-	C4A C4B (rs2280774)	0.383	CEU
rs592229	CHR_HSCHR6_MHC_DBB_CTG1:31944846-31944846	C	upstream_gene_variant	MODIFIER	-	-	-	-	C4A C4B (rs2280774)	0.383	CEU
rs592229	CHR_HSCHR6_MHC_DBB_CTG1:31944846-31944846	G	downstream_gene_variant	MODIFIER	-	-	-	-	C4A C4B (rs2280774)	0.383	CEU
rs592229	CHR_HSCHR6_MHC_DBB_CTG1:31944846-31944846	A	downstream_gene_variant	MODIFIER	-	-	-	-	C4A C4B (rs2280774)	0.383	CEU
rs592229	CHR_HSCHR6_MHC_DBB_CTG1:31944846-31944846	C	downstream_gene_variant	MODIFIER	-	-	-	-	C4A C4B (rs2280774)	0.383	CEU
rs592229	CHR_HSCHR6_MHC_DBB_CTG1:31944846-31944846	G	intron_variant,non_coding_transcript_variant	MODIFIER	-	-	-	-	C4A C4B (rs2280774)	0.383	CEU
rs592229	CHR_HSCHR6_MHC_DBB_CTG1:31944846-31944846	A	intron_variant,non_coding_transcript_variant	MODIFIER	-	-	-	-	C4A C4B (rs2280774)	0.383	CEU
rs592229	CHR_HSCHR6_MHC_DBB_CTG1:31944846-31944846	C	intron_variant,non_coding_transcript_variant	MODIFIER	-	-	-	-	C4A C4B (rs2280774)	0.383	CEU
rs592229	CHR_HSCHR6_MHC_DBB_CTG1:31944846-31944846	G	upstream_gene_variant	MODIFIER	-	-	-	-	C4A C4B (rs2280774)	0.383	CEU
rs592229	CHR_HSCHR6_MHC_DBB_CTG1:31944846-31944846	A	upstream_gene_variant	MODIFIER	-	-	-	-	C4A C4B (rs2280774)	0.383	CEU
rs592229	CHR_HSCHR6_MHC_DBB_CTG1:31944846-31944846	C	upstream_gene_variant	MODIFIER	-	-	-	-	C4A C4B (rs2280774)	0.383	CEU
rs592229	CHR_HSCHR6_MHC_DBB_CTG1:31944846-31944846	G	downstream_gene_variant	MODIFIER	-	-	-	-	C4A C4B (rs2280774)	0.383	CEU
rs592229	CHR_HSCHR6_MHC_DBB_CTG1:31944846-31944846	A	downstream_gene_variant	MODIFIER	-	-	-	-	C4A C4B (rs2280774)	0.383	CEU
rs592229	CHR_HSCHR6_MHC_DBB_CTG1:31944846-31944846	C	downstream_gene_variant	MODIFIER	-	-	-	-	C4A C4B (rs2280774)	0.383	CEU
rs592229	CHR_HSCHR6_MHC_MCF_CTG1:32039107-32039107	G	intron_variant	MODIFIER	-	-	-	-	C4A C4B (rs2280774)	0.383	CEU
rs592229	CHR_HSCHR6_MHC_MCF_CTG1:32039107-32039107	A	intron_variant	MODIFIER	-	-	-	-	C4A C4B (rs2280774)	0.383	CEU
rs592229	CHR_HSCHR6_MHC_MCF_CTG1:32039107-32039107	C	intron_variant	MODIFIER	-	-	-	-	C4A C4B (rs2280774)	0.383	CEU
rs592229	CHR_HSCHR6_MHC_MCF_CTG1:32039107-32039107	G	upstream_gene_variant	MODIFIER	-	-	-	-	C4A C4B (rs2280774)	0.383	CEU
rs592229	CHR_HSCHR6_MHC_MCF_CTG1:32039107-32039107	A	upstream_gene_variant	MODIFIER	-	-	-	-	C4A C4B (rs2280774)	0.383	CEU
rs592229	CHR_HSCHR6_MHC_MCF_CTG1:32039107-32039107	C	upstream_gene_variant	MODIFIER	-	-	-	-	C4A C4B (rs2280774)	0.383	CEU
rs592229	CHR_HSCHR6_MHC_MCF_CTG1:32039107-32039107	G	upstream_gene_variant	MODIFIER	-	-	-	-	C4A C4B (rs2280774)	0.383	CEU
rs592229	CHR_HSCHR6_MHC_MCF_CTG1:32039107-32039107	A	upstream_gene_variant	MODIFIER	-	-	-	-	C4A C4B (rs2280774)	0.383	CEU
rs592229	CHR_HSCHR6_MHC_MCF_CTG1:32039107-32039107	C	upstream_gene_variant	MODIFIER	-	-	-	-	C4A C4B (rs2280774)	0.383	CEU
rs592229	CHR_HSCHR6_MHC_MCF_CTG1:32039107-32039107	G	upstream_gene_variant	MODIFIER	-	-	-	-	C4A C4B (rs2280774)	0.383	CEU
rs592229	CHR_HSCHR6_MHC_MCF_CTG1:32039107-32039107	A	upstream_gene_variant	MODIFIER	-	-	-	-	C4A C4B (rs2280774)	0.383	CEU
rs592229	CHR_HSCHR6_MHC_MCF_CTG1:32039107-32039107	C	upstream_gene_variant	MODIFIER	-	-	-	-	C4A C4B (rs2280774)	0.383	CEU
rs592229	CHR_HSCHR6_MHC_MCF_CTG1:32039107-32039107	G	upstream_gene_variant	MODIFIER	-	-	-	-	C4A C4B (rs2280774)	0.383	CEU
rs592229	CHR_HSCHR6_MHC_MCF_CTG1:32039107-32039107	A	upstream_gene_variant	MODIFIER	-	-	-	-	C4A C4B (rs2280774)	0.383	CEU
rs592229	CHR_HSCHR6_MHC_MCF_CTG1:32039107-32039107	C	upstream_gene_variant	MODIFIER	-	-	-	-	C4A C4B (rs2280774)	0.383	CEU
rs592229	CHR_HSCHR6_MHC_MCF_CTG1:32039107-32039107	G	upstream_gene_variant	MODIFIER	-	-	-	-	C4A C4B (rs2280774)	0.383	CEU
rs592229	CHR_HSCHR6_MHC_MCF_CTG1:32039107-32039107	A	upstream_gene_variant	MODIFIER	-	-	-	-	C4A C4B (rs2280774)	0.383	CEU
rs592229	CHR_HSCHR6_MHC_MCF_CTG1:32039107-32039107	C	upstream_gene_variant	MODIFIER	-	-	-	-	C4A C4B (rs2280774)	0.383	CEU
rs592229	CHR_HSCHR6_MHC_MCF_CTG1:32039107-32039107	G	upstream_gene_variant	MODIFIER	-	-	-	-	C4A C4B (rs2280774)	0.383	CEU
rs592229	CHR_HSCHR6_MHC_MCF_CTG1:32039107-32039107	A	upstream_gene_variant	MODIFIER	-	-	-	-	C4A C4B (rs2280774)	0.383	CEU
rs592229	CHR_HSCHR6_MHC_MCF_CTG1:32039107-32039107	C	upstream_gene_variant	MODIFIER	-	-	-	-	C4A C4B (rs2280774)	0.383	CEU
rs592229	CHR_HSCHR6_MHC_MCF_CTG1:32039107-32039107	G	upstream_gene_variant	MODIFIER	-	-	-	-	C4A C4B (rs2280774)	0.383	CEU
rs592229	CHR_HSCHR6_MHC_MCF_CTG1:32039107-32039107	A	upstream_gene_variant	MODIFIER	-	-	-	-	C4A C4B (rs2280774)	0.383	CEU
rs592229	CHR_HSCHR6_MHC_MCF_CTG1:32039107-32039107	C	upstream_gene_variant	MODIFIER	-	-	-	-	C4A C4B (rs2280774)	0.383	CEU
rs592229	CHR_HSCHR6_MHC_MCF_CTG1:32039107-32039107	G	upstream_gene_variant	MODIFIER	-	-	-	-	C4A C4B (rs2280774)	0.383	CEU
rs592229	CHR_HSCHR6_MHC_MCF_CTG1:32039107-32039107	A	upstream_gene_variant	MODIFIER	-	-	-	-	C4A C4B (rs2280774)	0.383	CEU
rs592229	CHR_HSCHR6_MHC_MCF_CTG1:32039107-32039107	C	upstream_gene_variant	MODIFIER	-	-	-	-	C4A C4B (rs2280774)	0.383	CEU
rs592229	CHR_HSCHR6_MHC_MCF_CTG1:32039107-32039107	G	upstream_gene_variant	MODIFIER	-	-	-	-	C4A C4B (rs2280774)	0.383	CEU
rs592229	CHR_HSCHR6_MHC_MCF_CTG1:32039107-32039107	A	upstream_gene_variant	MODIFIER	-	-	-	-	C4A C4B (rs2280774)	0.383	CEU
rs592229	CHR_HSCHR6_MHC_MCF_CTG1:32039107-32039107	C	upstream_gene_variant	MODIFIER	-	-	-	-	C4A C4B (rs2280774)	0.383	CEU
rs592229	CHR_HSCHR6_MHC_MCF_CTG1:32039107-32039107	G	downstream_gene_variant	MODIFIER	-	-	-	-	C4A C4B (rs2280774)	0.383	CEU
rs592229	CHR_HSCHR6_MHC_MCF_CTG1:32039107-32039107	A	downstream_gene_variant	MODIFIER	-	-	-	-	C4A C4B (rs2280774)	0.383	CEU
rs592229	CHR_HSCHR6_MHC_MCF_CTG1:32039107-32039107	C	downstream_gene_variant	MODIFIER	-	-	-	-	C4A C4B (rs2280774)	0.383	CEU
rs592229	CHR_HSCHR6_MHC_MCF_CTG1:32039107-32039107	G	upstream_gene_variant	MODIFIER	-	-	-	-	C4A C4B (rs2280774)	0.383	CEU
rs592229	CHR_HSCHR6_MHC_MCF_CTG1:32039107-32039107	A	upstream_gene_variant	MODIFIER	-	-	-	-	C4A C4B (rs2280774)	0.383	CEU
rs592229	CHR_HSCHR6_MHC_MCF_CTG1:32039107-32039107	C	upstream_gene_variant	MODIFIER	-	-	-	-	C4A C4B (rs2280774)	0.383	CEU
rs592229	CHR_HSCHR6_MHC_MCF_CTG1:32039107-32039107	G	upstream_gene_variant	MODIFIER	-	-	-	-	C4A C4B (rs2280774)	0.383	CEU
rs592229	CHR_HSCHR6_MHC_MCF_CTG1:32039107-32039107	A	upstream_gene_variant	MODIFIER	-	-	-	-	C4A C4B (rs2280774)	0.383	CEU
rs592229	CHR_HSCHR6_MHC_MCF_CTG1:32039107-32039107	C	upstream_gene_variant	MODIFIER	-	-	-	-	C4A C4B (rs2280774)	0.383	CEU
rs592229	CHR_HSCHR6_MHC_MCF_CTG1:32039107-32039107	G	upstream_gene_variant	MODIFIER	-	-	-	-	C4A C4B (rs2280774)	0.383	CEU
rs592229	CHR_HSCHR6_MHC_MCF_CTG1:32039107-32039107	A	upstream_gene_variant	MODIFIER	-	-	-	-	C4A C4B (rs2280774)	0.383	CEU
rs592229	CHR_HSCHR6_MHC_MCF_CTG1:32039107-32039107	C	upstream_gene_variant	MODIFIER	-	-	-	-	C4A C4B (rs2280774)	0.383	CEU
rs592229	CHR_HSCHR6_MHC_MCF_CTG1:32039107-32039107	G	downstream_gene_variant	MODIFIER	-	-	-	-	C4A C4B (rs2280774)	0.383	CEU
rs592229	CHR_HSCHR6_MHC_MCF_CTG1:32039107-32039107	A	downstream_gene_variant	MODIFIER	-	-	-	-	C4A C4B (rs2280774)	0.383	CEU
rs592229	CHR_HSCHR6_MHC_MCF_CTG1:32039107-32039107	C	downstream_gene_variant	MODIFIER	-	-	-	-	C4A C4B (rs2280774)	0.383	CEU
rs592229	CHR_HSCHR6_MHC_MCF_CTG1:32039107-32039107	G	intron_variant,non_coding_transcript_variant	MODIFIER	-	-	-	-	C4A C4B (rs2280774)	0.383	CEU
rs592229	CHR_HSCHR6_MHC_MCF_CTG1:32039107-32039107	A	intron_variant,non_coding_transcript_variant	MODIFIER	-	-	-	-	C4A C4B (rs2280774)	0.383	CEU
rs592229	CHR_HSCHR6_MHC_MCF_CTG1:32039107-32039107	C	intron_variant,non_coding_transcript_variant	MODIFIER	-	-	-	-	C4A C4B (rs2280774)	0.383	CEU
rs592229	CHR_HSCHR6_MHC_MCF_CTG1:32039107-32039107	G	downstream_gene_variant	MODIFIER	-	-	-	-	C4A C4B (rs2280774)	0.383	CEU
rs592229	CHR_HSCHR6_MHC_MCF_CTG1:32039107-32039107	A	downstream_gene_variant	MODIFIER	-	-	-	-	C4A C4B (rs2280774)	0.383	CEU
rs592229	CHR_HSCHR6_MHC_MCF_CTG1:32039107-32039107	C	downstream_gene_variant	MODIFIER	-	-	-	-	C4A C4B (rs2280774)	0.383	CEU
rs592229	CHR_HSCHR6_MHC_MCF_CTG1:32039107-32039107	G	upstream_gene_variant	MODIFIER	-	-	-	-	C4A C4B (rs2280774)	0.383	CEU
rs592229	CHR_HSCHR6_MHC_MCF_CTG1:32039107-32039107	A	upstream_gene_variant	MODIFIER	-	-	-	-	C4A C4B (rs2280774)	0.383	CEU
rs592229	CHR_HSCHR6_MHC_MCF_CTG1:32039107-32039107	C	upstream_gene_variant	MODIFIER	-	-	-	-	C4A C4B (rs2280774)	0.383	CEU
rs592229	CHR_HSCHR6_MHC_MCF_CTG1:32039107-32039107	G	intron_variant,non_coding_transcript_variant	MODIFIER	-	-	-	-	C4A C4B (rs2280774)	0.383	CEU
rs592229	CHR_HSCHR6_MHC_MCF_CTG1:32039107-32039107	A	intron_variant,non_coding_transcript_variant	MODIFIER	-	-	-	-	C4A C4B (rs2280774)	0.383	CEU
rs592229	CHR_HSCHR6_MHC_MCF_CTG1:32039107-32039107	C	intron_variant,non_coding_transcript_variant	MODIFIER	-	-	-	-	C4A C4B (rs2280774)	0.383	CEU
rs592229	CHR_HSCHR6_MHC_MCF_CTG1:32039107-32039107	G	upstream_gene_variant	MODIFIER	-	-	-	-	C4A C4B (rs2280774)	0.383	CEU
rs592229	CHR_HSCHR6_MHC_MCF_CTG1:32039107-32039107	A	upstream_gene_variant	MODIFIER	-	-	-	-	C4A C4B (rs2280774)	0.383	CEU
rs592229	CHR_HSCHR6_MHC_MCF_CTG1:32039107-32039107	C	upstream_gene_variant	MODIFIER	-	-	-	-	C4A C4B (rs2280774)	0.383	CEU
rs592229	CHR_HSCHR6_MHC_MCF_CTG1:32039107-32039107	G	upstream_gene_variant	MODIFIER	-	-	-	-	C4A C4B (rs2280774)	0.383	CEU
rs592229	CHR_HSCHR6_MHC_MCF_CTG1:32039107-32039107	A	upstream_gene_variant	MODIFIER	-	-	-	-	C4A C4B (rs2280774)	0.383	CEU
rs592229	CHR_HSCHR6_MHC_MCF_CTG1:32039107-32039107	C	upstream_gene_variant	MODIFIER	-	-	-	-	C4A C4B (rs2280774)	0.383	CEU
rs592229	CHR_HSCHR6_MHC_MCF_CTG1:32039107-32039107	G	downstream_gene_variant	MODIFIER	-	-	-	-	C4A C4B (rs2280774)	0.383	CEU
rs592229	CHR_HSCHR6_MHC_MCF_CTG1:32039107-32039107	A	downstream_gene_variant	MODIFIER	-	-	-	-	C4A C4B (rs2280774)	0.383	CEU
rs592229	CHR_HSCHR6_MHC_MCF_CTG1:32039107-32039107	C	downstream_gene_variant	MODIFIER	-	-	-	-	C4A C4B (rs2280774)	0.383	CEU
rs592229	CHR_HSCHR6_MHC_QBL_CTG1:31953041-31953041	G	intron_variant	MODIFIER	-	-	-	-	C4A C4B (rs2280774)	0.383	CEU
rs592229	CHR_HSCHR6_MHC_QBL_CTG1:31953041-31953041	A	intron_variant	MODIFIER	-	-	-	-	C4A C4B (rs2280774)	0.383	CEU
rs592229	CHR_HSCHR6_MHC_QBL_CTG1:31953041-31953041	C	intron_variant	MODIFIER	-	-	-	-	C4A C4B (rs2280774)	0.383	CEU
rs592229	CHR_HSCHR6_MHC_QBL_CTG1:31953041-31953041	G	upstream_gene_variant	MODIFIER	-	-	-	-	C4A C4B (rs2280774)	0.383	CEU
rs592229	CHR_HSCHR6_MHC_QBL_CTG1:31953041-31953041	A	upstream_gene_variant	MODIFIER	-	-	-	-	C4A C4B (rs2280774)	0.383	CEU
rs592229	CHR_HSCHR6_MHC_QBL_CTG1:31953041-31953041	C	upstream_gene_variant	MODIFIER	-	-	-	-	C4A C4B (rs2280774)	0.383	CEU
rs592229	CHR_HSCHR6_MHC_QBL_CTG1:31953041-31953041	G	upstream_gene_variant	MODIFIER	-	-	-	-	C4A C4B (rs2280774)	0.383	CEU
rs592229	CHR_HSCHR6_MHC_QBL_CTG1:31953041-31953041	A	upstream_gene_variant	MODIFIER	-	-	-	-	C4A C4B (rs2280774)	0.383	CEU
rs592229	CHR_HSCHR6_MHC_QBL_CTG1:31953041-31953041	C	upstream_gene_variant	MODIFIER	-	-	-	-	C4A C4B (rs2280774)	0.383	CEU
rs592229	CHR_HSCHR6_MHC_QBL_CTG1:31953041-31953041	G	upstream_gene_variant	MODIFIER	-	-	-	-	C4A C4B (rs2280774)	0.383	CEU
rs592229	CHR_HSCHR6_MHC_QBL_CTG1:31953041-31953041	A	upstream_gene_variant	MODIFIER	-	-	-	-	C4A C4B (rs2280774)	0.383	CEU
rs592229	CHR_HSCHR6_MHC_QBL_CTG1:31953041-31953041	C	upstream_gene_variant	MODIFIER	-	-	-	-	C4A C4B (rs2280774)	0.383	CEU
rs592229	CHR_HSCHR6_MHC_QBL_CTG1:31953041-31953041	G	upstream_gene_variant	MODIFIER	-	-	-	-	C4A C4B (rs2280774)	0.383	CEU
rs592229	CHR_HSCHR6_MHC_QBL_CTG1:31953041-31953041	A	upstream_gene_variant	MODIFIER	-	-	-	-	C4A C4B (rs2280774)	0.383	CEU
rs592229	CHR_HSCHR6_MHC_QBL_CTG1:31953041-31953041	C	upstream_gene_variant	MODIFIER	-	-	-	-	C4A C4B (rs2280774)	0.383	CEU
rs592229	CHR_HSCHR6_MHC_QBL_CTG1:31953041-31953041	G	upstream_gene_variant	MODIFIER	-	-	-	-	C4A C4B (rs2280774)	0.383	CEU
rs592229	CHR_HSCHR6_MHC_QBL_CTG1:31953041-31953041	A	upstream_gene_variant	MODIFIER	-	-	-	-	C4A C4B (rs2280774)	0.383	CEU
rs592229	CHR_HSCHR6_MHC_QBL_CTG1:31953041-31953041	C	upstream_gene_variant	MODIFIER	-	-	-	-	C4A C4B (rs2280774)	0.383	CEU
rs592229	CHR_HSCHR6_MHC_QBL_CTG1:31953041-31953041	G	upstream_gene_variant	MODIFIER	-	-	-	-	C4A C4B (rs2280774)	0.383	CEU
rs592229	CHR_HSCHR6_MHC_QBL_CTG1:31953041-31953041	A	upstream_gene_variant	MODIFIER	-	-	-	-	C4A C4B (rs2280774)	0.383	CEU
rs592229	CHR_HSCHR6_MHC_QBL_CTG1:31953041-31953041	C	upstream_gene_variant	MODIFIER	-	-	-	-	C4A C4B (rs2280774)	0.383	CEU
rs592229	CHR_HSCHR6_MHC_QBL_CTG1:31953041-31953041	G	intron_variant,non_coding_transcript_variant	MODIFIER	-	-	-	-	C4A C4B (rs2280774)	0.383	CEU
rs592229	CHR_HSCHR6_MHC_QBL_CTG1:31953041-31953041	A	intron_variant,non_coding_transcript_variant	MODIFIER	-	-	-	-	C4A C4B (rs2280774)	0.383	CEU
rs592229	CHR_HSCHR6_MHC_QBL_CTG1:31953041-31953041	C	intron_variant,non_coding_transcript_variant	MODIFIER	-	-	-	-	C4A C4B (rs2280774)	0.383	CEU
rs592229	CHR_HSCHR6_MHC_QBL_CTG1:31953041-31953041	G	upstream_gene_variant	MODIFIER	-	-	-	-	C4A C4B (rs2280774)	0.383	CEU
rs592229	CHR_HSCHR6_MHC_QBL_CTG1:31953041-31953041	A	upstream_gene_variant	MODIFIER	-	-	-	-	C4A C4B (rs2280774)	0.383	CEU
rs592229	CHR_HSCHR6_MHC_QBL_CTG1:31953041-31953041	C	upstream_gene_variant	MODIFIER	-	-	-	-	C4A C4B (rs2280774)	0.383	CEU
rs592229	CHR_HSCHR6_MHC_QBL_CTG1:31953041-31953041	G	upstream_gene_variant	MODIFIER	-	-	-	-	C4A C4B (rs2280774)	0.383	CEU
rs592229	CHR_HSCHR6_MHC_QBL_CTG1:31953041-31953041	A	upstream_gene_variant	MODIFIER	-	-	-	-	C4A C4B (rs2280774)	0.383	CEU
rs592229	CHR_HSCHR6_MHC_QBL_CTG1:31953041-31953041	C	upstream_gene_variant	MODIFIER	-	-	-	-	C4A C4B (rs2280774)	0.383	CEU
rs592229	CHR_HSCHR6_MHC_QBL_CTG1:31953041-31953041	G	upstream_gene_variant	MODIFIER	-	-	-	-	C4A C4B (rs2280774)	0.383	CEU
rs592229	CHR_HSCHR6_MHC_QBL_CTG1:31953041-31953041	A	upstream_gene_variant	MODIFIER	-	-	-	-	C4A C4B (rs2280774)	0.383	CEU
rs592229	CHR_HSCHR6_MHC_QBL_CTG1:31953041-31953041	C	upstream_gene_variant	MODIFIER	-	-	-	-	C4A C4B (rs2280774)	0.383	CEU
rs592229	CHR_HSCHR6_MHC_QBL_CTG1:31953041-31953041	G	downstream_gene_variant	MODIFIER	-	-	-	-	C4A C4B (rs2280774)	0.383	CEU
rs592229	CHR_HSCHR6_MHC_QBL_CTG1:31953041-31953041	A	downstream_gene_variant	MODIFIER	-	-	-	-	C4A C4B (rs2280774)	0.383	CEU
rs592229	CHR_HSCHR6_MHC_QBL_CTG1:31953041-31953041	C	downstream_gene_variant	MODIFIER	-	-	-	-	C4A C4B (rs2280774)	0.383	CEU
rs592229	CHR_HSCHR6_MHC_QBL_CTG1:31953041-31953041	G	downstream_gene_variant	MODIFIER	-	-	-	-	C4A C4B (rs2280774)	0.383	CEU
rs592229	CHR_HSCHR6_MHC_QBL_CTG1:31953041-31953041	A	downstream_gene_variant	MODIFIER	-	-	-	-	C4A C4B (rs2280774)	0.383	CEU
rs592229	CHR_HSCHR6_MHC_QBL_CTG1:31953041-31953041	C	downstream_gene_variant	MODIFIER	-	-	-	-	C4A C4B (rs2280774)	0.383	CEU
rs592229	CHR_HSCHR6_MHC_QBL_CTG1:31953041-31953041	G	upstream_gene_variant	MODIFIER	-	-	-	-	C4A C4B (rs2280774)	0.383	CEU
rs592229	CHR_HSCHR6_MHC_QBL_CTG1:31953041-31953041	A	upstream_gene_variant	MODIFIER	-	-	-	-	C4A C4B (rs2280774)	0.383	CEU
rs592229	CHR_HSCHR6_MHC_QBL_CTG1:31953041-31953041	C	upstream_gene_variant	MODIFIER	-	-	-	-	C4A C4B (rs2280774)	0.383	CEU
rs592229	CHR_HSCHR6_MHC_QBL_CTG1:31953041-31953041	G	intron_variant,non_coding_transcript_variant	MODIFIER	-	-	-	-	C4A C4B (rs2280774)	0.383	CEU
rs592229	CHR_HSCHR6_MHC_QBL_CTG1:31953041-31953041	A	intron_variant,non_coding_transcript_variant	MODIFIER	-	-	-	-	C4A C4B (rs2280774)	0.383	CEU
rs592229	CHR_HSCHR6_MHC_QBL_CTG1:31953041-31953041	C	intron_variant,non_coding_transcript_variant	MODIFIER	-	-	-	-	C4A C4B (rs2280774)	0.383	CEU
rs592229	CHR_HSCHR6_MHC_QBL_CTG1:31953041-31953041	G	upstream_gene_variant	MODIFIER	-	-	-	-	C4A C4B (rs2280774)	0.383	CEU
rs592229	CHR_HSCHR6_MHC_QBL_CTG1:31953041-31953041	A	upstream_gene_variant	MODIFIER	-	-	-	-	C4A C4B (rs2280774)	0.383	CEU
rs592229	CHR_HSCHR6_MHC_QBL_CTG1:31953041-31953041	C	upstream_gene_variant	MODIFIER	-	-	-	-	C4A C4B (rs2280774)	0.383	CEU
rs592229	CHR_HSCHR6_MHC_QBL_CTG1:31953041-31953041	G	intron_variant,non_coding_transcript_variant	MODIFIER	-	-	-	-	C4A C4B (rs2280774)	0.383	CEU
rs592229	CHR_HSCHR6_MHC_QBL_CTG1:31953041-31953041	A	intron_variant,non_coding_transcript_variant	MODIFIER	-	-	-	-	C4A C4B (rs2280774)	0.383	CEU
rs592229	CHR_HSCHR6_MHC_QBL_CTG1:31953041-31953041	C	intron_variant,non_coding_transcript_variant	MODIFIER	-	-	-	-	C4A C4B (rs2280774)	0.383	CEU
rs592229	CHR_HSCHR6_MHC_QBL_CTG1:31953041-31953041	G	downstream_gene_variant	MODIFIER	-	-	-	-	C4A C4B (rs2280774)	0.383	CEU
rs592229	CHR_HSCHR6_MHC_QBL_CTG1:31953041-31953041	A	downstream_gene_variant	MODIFIER	-	-	-	-	C4A C4B (rs2280774)	0.383	CEU
rs592229	CHR_HSCHR6_MHC_QBL_CTG1:31953041-31953041	C	downstream_gene_variant	MODIFIER	-	-	-	-	C4A C4B (rs2280774)	0.383	CEU
rs592229	CHR_HSCHR6_MHC_QBL_CTG1:31953041-31953041	G	upstream_gene_variant	MODIFIER	-	-	-	-	C4A C4B (rs2280774)	0.383	CEU
rs592229	CHR_HSCHR6_MHC_QBL_CTG1:31953041-31953041	A	upstream_gene_variant	MODIFIER	-	-	-	-	C4A C4B (rs2280774)	0.383	CEU
rs592229	CHR_HSCHR6_MHC_QBL_CTG1:31953041-31953041	C	upstream_gene_variant	MODIFIER	-	-	-	-	C4A C4B (rs2280774)	0.383	CEU
rs592229	CHR_HSCHR6_MHC_QBL_CTG1:31953041-31953041	G	upstream_gene_variant	MODIFIER	-	-	-	-	C4A C4B (rs2280774)	0.383	CEU
rs592229	CHR_HSCHR6_MHC_QBL_CTG1:31953041-31953041	A	upstream_gene_variant	MODIFIER	-	-	-	-	C4A C4B (rs2280774)	0.383	CEU
rs592229	CHR_HSCHR6_MHC_QBL_CTG1:31953041-31953041	C	upstream_gene_variant	MODIFIER	-	-	-	-	C4A C4B (rs2280774)	0.383	CEU
rs592229	CHR_HSCHR6_MHC_QBL_CTG1:31953041-31953041	G	upstream_gene_variant	MODIFIER	-	-	-	-	C4A C4B (rs2280774)	0.383	CEU
rs592229	CHR_HSCHR6_MHC_QBL_CTG1:31953041-31953041	A	upstream_gene_variant	MODIFIER	-	-	-	-	C4A C4B (rs2280774)	0.383	CEU
rs592229	CHR_HSCHR6_MHC_QBL_CTG1:31953041-31953041	C	upstream_gene_variant	MODIFIER	-	-	-	-	C4A C4B (rs2280774)	0.383	CEU
rs592229	CHR_HSCHR6_MHC_QBL_CTG1:31953041-31953041	G	upstream_gene_variant	MODIFIER	-	-	-	-	C4A C4B (rs2280774)	0.383	CEU
rs592229	CHR_HSCHR6_MHC_QBL_CTG1:31953041-31953041	A	upstream_gene_variant	MODIFIER	-	-	-	-	C4A C4B (rs2280774)	0.383	CEU
rs592229	CHR_HSCHR6_MHC_QBL_CTG1:31953041-31953041	C	upstream_gene_variant	MODIFIER	-	-	-	-	C4A C4B (rs2280774)	0.383	CEU
rs592229	CHR_HSCHR6_MHC_QBL_CTG1:31953041-31953041	G	downstream_gene_variant	MODIFIER	-	-	-	-	C4A C4B (rs2280774)	0.383	CEU
rs592229	CHR_HSCHR6_MHC_QBL_CTG1:31953041-31953041	A	downstream_gene_variant	MODIFIER	-	-	-	-	C4A C4B (rs2280774)	0.383	CEU
rs592229	CHR_HSCHR6_MHC_QBL_CTG1:31953041-31953041	C	downstream_gene_variant	MODIFIER	-	-	-	-	C4A C4B (rs2280774)	0.383	CEU
rs592229	CHR_HSCHR6_MHC_SSTO_CTG1:31955318-31955318	G	intron_variant	MODIFIER	-	-	-	-	C4A C4B (rs2280774)	0.383	CEU
rs592229	CHR_HSCHR6_MHC_SSTO_CTG1:31955318-31955318	A	intron_variant	MODIFIER	-	-	-	-	C4A C4B (rs2280774)	0.383	CEU
rs592229	CHR_HSCHR6_MHC_SSTO_CTG1:31955318-31955318	C	intron_variant	MODIFIER	-	-	-	-	C4A C4B (rs2280774)	0.383	CEU
rs592229	CHR_HSCHR6_MHC_SSTO_CTG1:31955318-31955318	G	upstream_gene_variant	MODIFIER	-	-	-	-	C4A C4B (rs2280774)	0.383	CEU
rs592229	CHR_HSCHR6_MHC_SSTO_CTG1:31955318-31955318	A	upstream_gene_variant	MODIFIER	-	-	-	-	C4A C4B (rs2280774)	0.383	CEU
rs592229	CHR_HSCHR6_MHC_SSTO_CTG1:31955318-31955318	C	upstream_gene_variant	MODIFIER	-	-	-	-	C4A C4B (rs2280774)	0.383	CEU
rs592229	CHR_HSCHR6_MHC_SSTO_CTG1:31955318-31955318	G	upstream_gene_variant	MODIFIER	-	-	-	-	C4A C4B (rs2280774)	0.383	CEU
rs592229	CHR_HSCHR6_MHC_SSTO_CTG1:31955318-31955318	A	upstream_gene_variant	MODIFIER	-	-	-	-	C4A C4B (rs2280774)	0.383	CEU
rs592229	CHR_HSCHR6_MHC_SSTO_CTG1:31955318-31955318	C	upstream_gene_variant	MODIFIER	-	-	-	-	C4A C4B (rs2280774)	0.383	CEU
rs592229	CHR_HSCHR6_MHC_SSTO_CTG1:31955318-31955318	G	upstream_gene_variant	MODIFIER	-	-	-	-	C4A C4B (rs2280774)	0.383	CEU
rs592229	CHR_HSCHR6_MHC_SSTO_CTG1:31955318-31955318	A	upstream_gene_variant	MODIFIER	-	-	-	-	C4A C4B (rs2280774)	0.383	CEU
rs592229	CHR_HSCHR6_MHC_SSTO_CTG1:31955318-31955318	C	upstream_gene_variant	MODIFIER	-	-	-	-	C4A C4B (rs2280774)	0.383	CEU
rs592229	CHR_HSCHR6_MHC_SSTO_CTG1:31955318-31955318	G	upstream_gene_variant	MODIFIER	-	-	-	-	C4A C4B (rs2280774)	0.383	CEU
rs592229	CHR_HSCHR6_MHC_SSTO_CTG1:31955318-31955318	A	upstream_gene_variant	MODIFIER	-	-	-	-	C4A C4B (rs2280774)	0.383	CEU
rs592229	CHR_HSCHR6_MHC_SSTO_CTG1:31955318-31955318	C	upstream_gene_variant	MODIFIER	-	-	-	-	C4A C4B (rs2280774)	0.383	CEU
rs592229	CHR_HSCHR6_MHC_SSTO_CTG1:31955318-31955318	G	upstream_gene_variant	MODIFIER	-	-	-	-	C4A C4B (rs2280774)	0.383	CEU
rs592229	CHR_HSCHR6_MHC_SSTO_CTG1:31955318-31955318	A	upstream_gene_variant	MODIFIER	-	-	-	-	C4A C4B (rs2280774)	0.383	CEU
rs592229	CHR_HSCHR6_MHC_SSTO_CTG1:31955318-31955318	C	upstream_gene_variant	MODIFIER	-	-	-	-	C4A C4B (rs2280774)	0.383	CEU
rs592229	CHR_HSCHR6_MHC_SSTO_CTG1:31955318-31955318	G	upstream_gene_variant	MODIFIER	-	-	-	-	C4A C4B (rs2280774)	0.383	CEU
rs592229	CHR_HSCHR6_MHC_SSTO_CTG1:31955318-31955318	A	upstream_gene_variant	MODIFIER	-	-	-	-	C4A C4B (rs2280774)	0.383	CEU
rs592229	CHR_HSCHR6_MHC_SSTO_CTG1:31955318-31955318	C	upstream_gene_variant	MODIFIER	-	-	-	-	C4A C4B (rs2280774)	0.383	CEU
rs592229	CHR_HSCHR6_MHC_SSTO_CTG1:31955318-31955318	G	intron_variant,non_coding_transcript_variant	MODIFIER	-	-	-	-	C4A C4B (rs2280774)	0.383	CEU
rs592229	CHR_HSCHR6_MHC_SSTO_CTG1:31955318-31955318	A	intron_variant,non_coding_transcript_variant	MODIFIER	-	-	-	-	C4A C4B (rs2280774)	0.383	CEU
rs592229	CHR_HSCHR6_MHC_SSTO_CTG1:31955318-31955318	C	intron_variant,non_coding_transcript_variant	MODIFIER	-	-	-	-	C4A C4B (rs2280774)	0.383	CEU
rs592229	CHR_HSCHR6_MHC_SSTO_CTG1:31955318-31955318	G	upstream_gene_variant	MODIFIER	-	-	-	-	C4A C4B (rs2280774)	0.383	CEU
rs592229	CHR_HSCHR6_MHC_SSTO_CTG1:31955318-31955318	A	upstream_gene_variant	MODIFIER	-	-	-	-	C4A C4B (rs2280774)	0.383	CEU
rs592229	CHR_HSCHR6_MHC_SSTO_CTG1:31955318-31955318	C	upstream_gene_variant	MODIFIER	-	-	-	-	C4A C4B (rs2280774)	0.383	CEU
rs592229	CHR_HSCHR6_MHC_SSTO_CTG1:31955318-31955318	G	upstream_gene_variant	MODIFIER	-	-	-	-	C4A C4B (rs2280774)	0.383	CEU
rs592229	CHR_HSCHR6_MHC_SSTO_CTG1:31955318-31955318	A	upstream_gene_variant	MODIFIER	-	-	-	-	C4A C4B (rs2280774)	0.383	CEU
rs592229	CHR_HSCHR6_MHC_SSTO_CTG1:31955318-31955318	C	upstream_gene_variant	MODIFIER	-	-	-	-	C4A C4B (rs2280774)	0.383	CEU
rs592229	CHR_HSCHR6_MHC_SSTO_CTG1:31955318-31955318	G	upstream_gene_variant	MODIFIER	-	-	-	-	C4A C4B (rs2280774)	0.383	CEU
rs592229	CHR_HSCHR6_MHC_SSTO_CTG1:31955318-31955318	A	upstream_gene_variant	MODIFIER	-	-	-	-	C4A C4B (rs2280774)	0.383	CEU
rs592229	CHR_HSCHR6_MHC_SSTO_CTG1:31955318-31955318	C	upstream_gene_variant	MODIFIER	-	-	-	-	C4A C4B (rs2280774)	0.383	CEU
rs592229	CHR_HSCHR6_MHC_SSTO_CTG1:31955318-31955318	G	intron_variant,non_coding_transcript_variant	MODIFIER	-	-	-	-	C4A C4B (rs2280774)	0.383	CEU
rs592229	CHR_HSCHR6_MHC_SSTO_CTG1:31955318-31955318	A	intron_variant,non_coding_transcript_variant	MODIFIER	-	-	-	-	C4A C4B (rs2280774)	0.383	CEU
rs592229	CHR_HSCHR6_MHC_SSTO_CTG1:31955318-31955318	C	intron_variant,non_coding_transcript_variant	MODIFIER	-	-	-	-	C4A C4B (rs2280774)	0.383	CEU
rs592229	CHR_HSCHR6_MHC_SSTO_CTG1:31955318-31955318	G	upstream_gene_variant	MODIFIER	-	-	-	-	C4A C4B (rs2280774)	0.383	CEU
rs592229	CHR_HSCHR6_MHC_SSTO_CTG1:31955318-31955318	A	upstream_gene_variant	MODIFIER	-	-	-	-	C4A C4B (rs2280774)	0.383	CEU
rs592229	CHR_HSCHR6_MHC_SSTO_CTG1:31955318-31955318	C	upstream_gene_variant	MODIFIER	-	-	-	-	C4A C4B (rs2280774)	0.383	CEU
rs592229	CHR_HSCHR6_MHC_SSTO_CTG1:31955318-31955318	G	downstream_gene_variant	MODIFIER	-	-	-	-	C4A C4B (rs2280774)	0.383	CEU
rs592229	CHR_HSCHR6_MHC_SSTO_CTG1:31955318-31955318	A	downstream_gene_variant	MODIFIER	-	-	-	-	C4A C4B (rs2280774)	0.383	CEU
rs592229	CHR_HSCHR6_MHC_SSTO_CTG1:31955318-31955318	C	downstream_gene_variant	MODIFIER	-	-	-	-	C4A C4B (rs2280774)	0.383	CEU
rs592229	CHR_HSCHR6_MHC_SSTO_CTG1:31955318-31955318	G	upstream_gene_variant	MODIFIER	-	-	-	-	C4A C4B (rs2280774)	0.383	CEU
rs592229	CHR_HSCHR6_MHC_SSTO_CTG1:31955318-31955318	A	upstream_gene_variant	MODIFIER	-	-	-	-	C4A C4B (rs2280774)	0.383	CEU
rs592229	CHR_HSCHR6_MHC_SSTO_CTG1:31955318-31955318	C	upstream_gene_variant	MODIFIER	-	-	-	-	C4A C4B (rs2280774)	0.383	CEU
rs592229	CHR_HSCHR6_MHC_SSTO_CTG1:31955318-31955318	G	downstream_gene_variant	MODIFIER	-	-	-	-	C4A C4B (rs2280774)	0.383	CEU
rs592229	CHR_HSCHR6_MHC_SSTO_CTG1:31955318-31955318	A	downstream_gene_variant	MODIFIER	-	-	-	-	C4A C4B (rs2280774)	0.383	CEU
rs592229	CHR_HSCHR6_MHC_SSTO_CTG1:31955318-31955318	C	downstream_gene_variant	MODIFIER	-	-	-	-	C4A C4B (rs2280774)	0.383	CEU
rs592229	CHR_HSCHR6_MHC_SSTO_CTG1:31955318-31955318	G	upstream_gene_variant	MODIFIER	-	-	-	-	C4A C4B (rs2280774)	0.383	CEU
rs592229	CHR_HSCHR6_MHC_SSTO_CTG1:31955318-31955318	A	upstream_gene_variant	MODIFIER	-	-	-	-	C4A C4B (rs2280774)	0.383	CEU
rs592229	CHR_HSCHR6_MHC_SSTO_CTG1:31955318-31955318	C	upstream_gene_variant	MODIFIER	-	-	-	-	C4A C4B (rs2280774)	0.383	CEU
rs592229	CHR_HSCHR6_MHC_SSTO_CTG1:31955318-31955318	G	upstream_gene_variant	MODIFIER	-	-	-	-	C4A C4B (rs2280774)	0.383	CEU
rs592229	CHR_HSCHR6_MHC_SSTO_CTG1:31955318-31955318	A	upstream_gene_variant	MODIFIER	-	-	-	-	C4A C4B (rs2280774)	0.383	CEU
rs592229	CHR_HSCHR6_MHC_SSTO_CTG1:31955318-31955318	C	upstream_gene_variant	MODIFIER	-	-	-	-	C4A C4B (rs2280774)	0.383	CEU
rs592229	CHR_HSCHR6_MHC_SSTO_CTG1:31955318-31955318	G	downstream_gene_variant	MODIFIER	-	-	-	-	C4A C4B (rs2280774)	0.383	CEU
rs592229	CHR_HSCHR6_MHC_SSTO_CTG1:31955318-31955318	A	downstream_gene_variant	MODIFIER	-	-	-	-	C4A C4B (rs2280774)	0.383	CEU
rs592229	CHR_HSCHR6_MHC_SSTO_CTG1:31955318-31955318	C	downstream_gene_variant	MODIFIER	-	-	-	-	C4A C4B (rs2280774)	0.383	CEU
rs592229	CHR_HSCHR6_MHC_SSTO_CTG1:31955318-31955318	G	upstream_gene_variant	MODIFIER	-	-	-	-	C4A C4B (rs2280774)	0.383	CEU
rs592229	CHR_HSCHR6_MHC_SSTO_CTG1:31955318-31955318	A	upstream_gene_variant	MODIFIER	-	-	-	-	C4A C4B (rs2280774)	0.383	CEU
rs592229	CHR_HSCHR6_MHC_SSTO_CTG1:31955318-31955318	C	upstream_gene_variant	MODIFIER	-	-	-	-	C4A C4B (rs2280774)	0.383	CEU
rs592229	CHR_HSCHR6_MHC_SSTO_CTG1:31955318-31955318	G	downstream_gene_variant	MODIFIER	-	-	-	-	C4A C4B (rs2280774)	0.383	CEU
rs592229	CHR_HSCHR6_MHC_SSTO_CTG1:31955318-31955318	A	downstream_gene_variant	MODIFIER	-	-	-	-	C4A C4B (rs2280774)	0.383	CEU
rs592229	CHR_HSCHR6_MHC_SSTO_CTG1:31955318-31955318	C	downstream_gene_variant	MODIFIER	-	-	-	-	C4A C4B (rs2280774)	0.383	CEU
rs592229	CHR_HSCHR6_MHC_SSTO_CTG1:31955318-31955318	G	upstream_gene_variant	MODIFIER	-	-	-	-	C4A C4B (rs2280774)	0.383	CEU
rs592229	CHR_HSCHR6_MHC_SSTO_CTG1:31955318-31955318	A	upstream_gene_variant	MODIFIER	-	-	-	-	C4A C4B (rs2280774)	0.383	CEU
rs592229	CHR_HSCHR6_MHC_SSTO_CTG1:31955318-31955318	C	upstream_gene_variant	MODIFIER	-	-	-	-	C4A C4B (rs2280774)	0.383	CEU
rs112934460	18:74281744-74281758	TGTGTGTGTGT	intron_variant	MODIFIER	-	-	0.983	-0.06433	CYB5A (rs7239618)	0.327	CEU
rs112934460	18:74281744-74281758	TGTGTGTGTGTGTGTGTGT	intron_variant	MODIFIER	-	-	0.706	-0.133782	CYB5A (rs7239618)	0.327	CEU
rs112934460	18:74281744-74281758	TGTGTGTGTGTGTGTGTGTGT	intron_variant	MODIFIER	-	-	0.719	-0.129842	CYB5A (rs7239618)	0.327	CEU
rs112934460	18:74281744-74281758	TGTGTGTGTGTGTGTGTGTGTGT	intron_variant	MODIFIER	-	-	0.729	-0.12703	CYB5A (rs7239618)	0.327	CEU
rs112934460	18:74281744-74281758	TGTGTGTGTGTGTGTGTGTGTGTGTGT	intron_variant	MODIFIER	-	-	1.123	-0.036633	CYB5A (rs7239618)	0.327	CEU
rs112934460	18:74281744-74281758	TGTGTGTGTGTGTGTGTGTGTGTGTGTGT	intron_variant	MODIFIER	-	-	1.078	-0.045167	CYB5A (rs7239618)	0.327	CEU
rs112934460	18:74281744-74281758	TGTGTGTGTGTGTGTGTGTGTGTGTGTGTGT	intron_variant	MODIFIER	-	-	1.035	-0.0537	CYB5A (rs7239618)	0.327	CEU
rs112934460	18:74281744-74281758	TGTGTGTGTGTGTGTGTGTGTGTGTGTGTGTGT	intron_variant	MODIFIER	-	-	0.993	-0.062234	CYB5A (rs7239618)	0.327	CEU
rs112934460	18:74281744-74281758	TGTGTGTGTGTGTGTGTGTGTGTGTGTGTGTGTGT	intron_variant	MODIFIER	-	-	0.954	-0.070768	CYB5A (rs7239618)	0.327	CEU
rs112934460	18:74281744-74281758	TGTGTGTGTGTGTGTGTGTGTGTGTGTGTGTGTGTGT	intron_variant	MODIFIER	-	-	0.915	-0.079302	CYB5A (rs7239618)	0.327	CEU
rs112934460	18:74281744-74281758	TGTGTGTGTGTGTGTGTGTGTGTGTGTGTGTGTGTGTGT	intron_variant	MODIFIER	-	-	0.879	-0.087836	CYB5A (rs7239618)	0.327	CEU
rs112934460	18:74281744-74281758	TGTGTGTGTGTGTGTGTGTGTGTGTGTGTGTGTGTGTGTGT	intron_variant	MODIFIER	-	-	0.844	-0.096369	CYB5A (rs7239618)	0.327	CEU
rs112934460	18:74281744-74281758	TGTGTGTGTGTGTGTGTGTGTGTGTGTGTGTGTGTGTGTGTGT	intron_variant	MODIFIER	-	-	0.81	-0.104903	CYB5A (rs7239618)	0.327	CEU
rs112934460	18:74281744-74281758	TGTGTGTGTGTGTGTGTGTGTGTGTGTGTGTGTGTGTGTGTGTGT	intron_variant	MODIFIER	-	-	0.778	-0.113437	CYB5A (rs7239618)	0.327	CEU
rs112934460	18:74281744-74281758	TGTGTGTGTGTGTGTGTGTGTGTGTGTGTGTGTGTGTGTGTGTGTGT	intron_variant	MODIFIER	-	-	0.747	-0.121971	CYB5A (rs7239618)	0.327	CEU
rs112934460	18:74281744-74281758	TGTGTGTGTGTGTGTGTGTGTGTGTGTGTGTGTGTGTGTGTGTGTGTGT	intron_variant	MODIFIER	-	-	0.717	-0.130505	CYB5A (rs7239618)	0.327	CEU
rs112934460	18:74281744-74281758	TGTGTGTGTGTGTGTGTGTGTGTGTGTGTGTGTGTGTGTGTGTGTGTGTGT	intron_variant	MODIFIER	-	-	0.688	-0.139038	CYB5A (rs7239618)	0.327	CEU
rs112934460	18:74281744-74281758	TGTGTGTGTGTGTGTGTGTGTGTGTGTGTGTGTGTGTGTGTGTGTGTGTGTGT	intron_variant	MODIFIER	-	-	0.66	-0.147572	CYB5A (rs7239618)	0.327	CEU
rs112934460	18:74281744-74281758	TGTGTGTGTGTGTGTGTGTGTGTGTGTGTGTGTGTGTGTGTGTGTGTGTGTGTGT	intron_variant	MODIFIER	-	-	0.634	-0.156106	CYB5A (rs7239618)	0.327	CEU
rs112934460	18:74281744-74281758	TGTGTGTGTGTGTGTGTGTGTGTGTGTGTGTGTGTGTGTGTGTGTGTGTGTGTGTGT	intron_variant	MODIFIER	-	-	0.608	-0.16464	CYB5A (rs7239618)	0.327	CEU
rs112934460	18:74281744-74281758	TGTGTGTGTGT	intron_variant,non_coding_transcript_variant	MODIFIER	-	-	0.983	-0.06433	CYB5A (rs7239618)	0.327	CEU
rs112934460	18:74281744-74281758	TGTGTGTGTGTGTGTGTGT	intron_variant,non_coding_transcript_variant	MODIFIER	-	-	0.706	-0.133782	CYB5A (rs7239618)	0.327	CEU
rs112934460	18:74281744-74281758	TGTGTGTGTGTGTGTGTGTGT	intron_variant,non_coding_transcript_variant	MODIFIER	-	-	0.719	-0.129842	CYB5A (rs7239618)	0.327	CEU
rs112934460	18:74281744-74281758	TGTGTGTGTGTGTGTGTGTGTGT	intron_variant,non_coding_transcript_variant	MODIFIER	-	-	0.729	-0.12703	CYB5A (rs7239618)	0.327	CEU
rs112934460	18:74281744-74281758	TGTGTGTGTGTGTGTGTGTGTGTGTGT	intron_variant,non_coding_transcript_variant	MODIFIER	-	-	1.123	-0.036633	CYB5A (rs7239618)	0.327	CEU
rs112934460	18:74281744-74281758	TGTGTGTGTGTGTGTGTGTGTGTGTGTGT	intron_variant,non_coding_transcript_variant	MODIFIER	-	-	1.078	-0.045167	CYB5A (rs7239618)	0.327	CEU
rs112934460	18:74281744-74281758	TGTGTGTGTGTGTGTGTGTGTGTGTGTGTGT	intron_variant,non_coding_transcript_variant	MODIFIER	-	-	1.035	-0.0537	CYB5A (rs7239618)	0.327	CEU
rs112934460	18:74281744-74281758	TGTGTGTGTGTGTGTGTGTGTGTGTGTGTGTGT	intron_variant,non_coding_transcript_variant	MODIFIER	-	-	0.993	-0.062234	CYB5A (rs7239618)	0.327	CEU
rs112934460	18:74281744-74281758	TGTGTGTGTGTGTGTGTGTGTGTGTGTGTGTGTGT	intron_variant,non_coding_transcript_variant	MODIFIER	-	-	0.954	-0.070768	CYB5A (rs7239618)	0.327	CEU
rs112934460	18:74281744-74281758	TGTGTGTGTGTGTGTGTGTGTGTGTGTGTGTGTGTGT	intron_variant,non_coding_transcript_variant	MODIFIER	-	-	0.915	-0.079302	CYB5A (rs7239618)	0.327	CEU
rs112934460	18:74281744-74281758	TGTGTGTGTGTGTGTGTGTGTGTGTGTGTGTGTGTGTGT	intron_variant,non_coding_transcript_variant	MODIFIER	-	-	0.879	-0.087836	CYB5A (rs7239618)	0.327	CEU
rs112934460	18:74281744-74281758	TGTGTGTGTGTGTGTGTGTGTGTGTGTGTGTGTGTGTGTGT	intron_variant,non_coding_transcript_variant	MODIFIER	-	-	0.844	-0.096369	CYB5A (rs7239618)	0.327	CEU
rs112934460	18:74281744-74281758	TGTGTGTGTGTGTGTGTGTGTGTGTGTGTGTGTGTGTGTGTGT	intron_variant,non_coding_transcript_variant	MODIFIER	-	-	0.81	-0.104903	CYB5A (rs7239618)	0.327	CEU
rs112934460	18:74281744-74281758	TGTGTGTGTGTGTGTGTGTGTGTGTGTGTGTGTGTGTGTGTGTGT	intron_variant,non_coding_transcript_variant	MODIFIER	-	-	0.778	-0.113437	CYB5A (rs7239618)	0.327	CEU
rs112934460	18:74281744-74281758	TGTGTGTGTGTGTGTGTGTGTGTGTGTGTGTGTGTGTGTGTGTGTGT	intron_variant,non_coding_transcript_variant	MODIFIER	-	-	0.747	-0.121971	CYB5A (rs7239618)	0.327	CEU
rs112934460	18:74281744-74281758	TGTGTGTGTGTGTGTGTGTGTGTGTGTGTGTGTGTGTGTGTGTGTGTGT	intron_variant,non_coding_transcript_variant	MODIFIER	-	-	0.717	-0.130505	CYB5A (rs7239618)	0.327	CEU
rs112934460	18:74281744-74281758	TGTGTGTGTGTGTGTGTGTGTGTGTGTGTGTGTGTGTGTGTGTGTGTGTGT	intron_variant,non_coding_transcript_variant	MODIFIER	-	-	0.688	-0.139038	CYB5A (rs7239618)	0.327	CEU
rs112934460	18:74281744-74281758	TGTGTGTGTGTGTGTGTGTGTGTGTGTGTGTGTGTGTGTGTGTGTGTGTGTGT	intron_variant,non_coding_transcript_variant	MODIFIER	-	-	0.66	-0.147572	CYB5A (rs7239618)	0.327	CEU
rs112934460	18:74281744-74281758	TGTGTGTGTGTGTGTGTGTGTGTGTGTGTGTGTGTGTGTGTGTGTGTGTGTGTGT	intron_variant,non_coding_transcript_variant	MODIFIER	-	-	0.634	-0.156106	CYB5A (rs7239618)	0.327	CEU
rs112934460	18:74281744-74281758	TGTGTGTGTGTGTGTGTGTGTGTGTGTGTGTGTGTGTGTGTGTGTGTGTGTGTGTGT	intron_variant,non_coding_transcript_variant	MODIFIER	-	-	0.608	-0.16464	CYB5A (rs7239618)	0.327	CEU
rs112934460	18:74281744-74281758	TGTGTGTGTGT	regulatory_region_variant	MODIFIER	-	-	0.983	-0.06433	CYB5A (rs7239618)	0.327	CEU
rs112934460	18:74281744-74281758	TGTGTGTGTGTGTGTGTGT	regulatory_region_variant	MODIFIER	-	-	0.706	-0.133782	CYB5A (rs7239618)	0.327	CEU
rs112934460	18:74281744-74281758	TGTGTGTGTGTGTGTGTGTGT	regulatory_region_variant	MODIFIER	-	-	0.719	-0.129842	CYB5A (rs7239618)	0.327	CEU
rs112934460	18:74281744-74281758	TGTGTGTGTGTGTGTGTGTGTGT	regulatory_region_variant	MODIFIER	-	-	0.729	-0.12703	CYB5A (rs7239618)	0.327	CEU
rs112934460	18:74281744-74281758	TGTGTGTGTGTGTGTGTGTGTGTGTGT	regulatory_region_variant	MODIFIER	-	-	1.123	-0.036633	CYB5A (rs7239618)	0.327	CEU
rs112934460	18:74281744-74281758	TGTGTGTGTGTGTGTGTGTGTGTGTGTGT	regulatory_region_variant	MODIFIER	-	-	1.078	-0.045167	CYB5A (rs7239618)	0.327	CEU
rs112934460	18:74281744-74281758	TGTGTGTGTGTGTGTGTGTGTGTGTGTGTGT	regulatory_region_variant	MODIFIER	-	-	1.035	-0.0537	CYB5A (rs7239618)	0.327	CEU
rs112934460	18:74281744-74281758	TGTGTGTGTGTGTGTGTGTGTGTGTGTGTGTGT	regulatory_region_variant	MODIFIER	-	-	0.993	-0.062234	CYB5A (rs7239618)	0.327	CEU
rs112934460	18:74281744-74281758	TGTGTGTGTGTGTGTGTGTGTGTGTGTGTGTGTGT	regulatory_region_variant	MODIFIER	-	-	0.954	-0.070768	CYB5A (rs7239618)	0.327	CEU
rs112934460	18:74281744-74281758	TGTGTGTGTGTGTGTGTGTGTGTGTGTGTGTGTGTGT	regulatory_region_variant	MODIFIER	-	-	0.915	-0.079302	CYB5A (rs7239618)	0.327	CEU
rs112934460	18:74281744-74281758	TGTGTGTGTGTGTGTGTGTGTGTGTGTGTGTGTGTGTGT	regulatory_region_variant	MODIFIER	-	-	0.879	-0.087836	CYB5A (rs7239618)	0.327	CEU
rs112934460	18:74281744-74281758	TGTGTGTGTGTGTGTGTGTGTGTGTGTGTGTGTGTGTGTGT	regulatory_region_variant	MODIFIER	-	-	0.844	-0.096369	CYB5A (rs7239618)	0.327	CEU
rs112934460	18:74281744-74281758	TGTGTGTGTGTGTGTGTGTGTGTGTGTGTGTGTGTGTGTGTGT	regulatory_region_variant	MODIFIER	-	-	0.81	-0.104903	CYB5A (rs7239618)	0.327	CEU
rs112934460	18:74281744-74281758	TGTGTGTGTGTGTGTGTGTGTGTGTGTGTGTGTGTGTGTGTGTGT	regulatory_region_variant	MODIFIER	-	-	0.778	-0.113437	CYB5A (rs7239618)	0.327	CEU
rs112934460	18:74281744-74281758	TGTGTGTGTGTGTGTGTGTGTGTGTGTGTGTGTGTGTGTGTGTGTGT	regulatory_region_variant	MODIFIER	-	-	0.747	-0.121971	CYB5A (rs7239618)	0.327	CEU
rs112934460	18:74281744-74281758	TGTGTGTGTGTGTGTGTGTGTGTGTGTGTGTGTGTGTGTGTGTGTGTGT	regulatory_region_variant	MODIFIER	-	-	0.717	-0.130505	CYB5A (rs7239618)	0.327	CEU
rs112934460	18:74281744-74281758	TGTGTGTGTGTGTGTGTGTGTGTGTGTGTGTGTGTGTGTGTGTGTGTGTGT	regulatory_region_variant	MODIFIER	-	-	0.688	-0.139038	CYB5A (rs7239618)	0.327	CEU
rs112934460	18:74281744-74281758	TGTGTGTGTGTGTGTGTGTGTGTGTGTGTGTGTGTGTGTGTGTGTGTGTGTGT	regulatory_region_variant	MODIFIER	-	-	0.66	-0.147572	CYB5A (rs7239618)	0.327	CEU
rs112934460	18:74281744-74281758	TGTGTGTGTGTGTGTGTGTGTGTGTGTGTGTGTGTGTGTGTGTGTGTGTGTGTGT	regulatory_region_variant	MODIFIER	-	-	0.634	-0.156106	CYB5A (rs7239618)	0.327	CEU
rs112934460	18:74281744-74281758	TGTGTGTGTGTGTGTGTGTGTGTGTGTGTGTGTGTGTGTGTGTGTGTGTGTGTGTGT	regulatory_region_variant	MODIFIER	-	-	0.608	-0.16464	CYB5A (rs7239618)	0.327	CEU
rs142672206	18:74279651-74279655	TTT	intron_variant	MODIFIER	-	-	1.857	0.072652	CYB5A (rs7239618)	0.464	CEU
rs142672206	18:74279651-74279655	TTTGTTTGTTT	intron_variant	MODIFIER	-	-	-	-	CYB5A (rs7239618)	0.464	CEU
rs142672206	18:74279651-74279655	TTT	intron_variant,non_coding_transcript_variant	MODIFIER	-	-	1.857	0.072652	CYB5A (rs7239618)	0.464	CEU
rs142672206	18:74279651-74279655	TTTGTTTGTTT	intron_variant,non_coding_transcript_variant	MODIFIER	-	-	-	-	CYB5A (rs7239618)	0.464	CEU
rs147314006	18:74279570-74279570	AAGAAGA	intron_variant	MODIFIER	-	-	0.957	-0.070102	CYB5A (rs7239618)	0.952	CEU
rs147314006	18:74279570-74279570	AAGAAGA	intron_variant,non_coding_transcript_variant	MODIFIER	-	-	0.957	-0.070102	CYB5A (rs7239618)	0.952	CEU
rs147314006	18:74279570-74279570	AAGAAGA	regulatory_region_variant	MODIFIER	-	-	0.957	-0.070102	CYB5A (rs7239618)	0.952	CEU
rs1558948	18:74286356-74286356	A	intron_variant	MODIFIER	-	-	1.625	0.04258	CYB5A (rs7239618)	0.89	CEU
rs1558948	18:74286356-74286356	G	intron_variant	MODIFIER	-	-	1.789	0.064159	CYB5A (rs7239618)	0.89	CEU
rs1558948	18:74286356-74286356	A	intron_variant,non_coding_transcript_variant	MODIFIER	-	-	1.625	0.04258	CYB5A (rs7239618)	0.89	CEU
rs1558948	18:74286356-74286356	G	intron_variant,non_coding_transcript_variant	MODIFIER	-	-	1.789	0.064159	CYB5A (rs7239618)	0.89	CEU
rs1558948	18:74286356-74286356	A	regulatory_region_variant	MODIFIER	-	-	1.625	0.04258	CYB5A (rs7239618)	0.89	CEU
rs1558948	18:74286356-74286356	G	regulatory_region_variant	MODIFIER	-	-	1.789	0.064159	CYB5A (rs7239618)	0.89	CEU
rs1788640	18:74281040-74281040	A	intron_variant	MODIFIER	-	-	3.783	0.256749	CYB5A (rs7239618)	0.84	CEU
rs1788640	18:74281040-74281040	A	intron_variant,non_coding_transcript_variant	MODIFIER	-	-	3.783	0.256749	CYB5A (rs7239618)	0.84	CEU
rs1788640	18:74281040-74281040	A	regulatory_region_variant	MODIFIER	-	-	3.783	0.256749	CYB5A (rs7239618)	0.84	CEU
rs1788641	18:74282394-74282394	G	intron_variant	MODIFIER	-	-	4.185	0.291082	CYB5A (rs7239618)	0.89	CEU
rs1788641	18:74282394-74282394	T	intron_variant	MODIFIER	-	-	3.68	0.247929	CYB5A (rs7239618)	0.89	CEU
rs1788641	18:74282394-74282394	G	intron_variant,non_coding_transcript_variant	MODIFIER	-	-	4.185	0.291082	CYB5A (rs7239618)	0.89	CEU
rs1788641	18:74282394-74282394	T	intron_variant,non_coding_transcript_variant	MODIFIER	-	-	3.68	0.247929	CYB5A (rs7239618)	0.89	CEU
rs1788641	18:74282394-74282394	G	regulatory_region_variant	MODIFIER	-	-	4.185	0.291082	CYB5A (rs7239618)	0.89	CEU
rs1788641	18:74282394-74282394	T	regulatory_region_variant	MODIFIER	-	-	3.68	0.247929	CYB5A (rs7239618)	0.89	CEU
rs1790834	18:74281022-74281022	A	intron_variant	MODIFIER	-	-	1.819	0.067945	CYB5A (rs7239618)	0.373	CEU
rs1790834	18:74281022-74281022	A	intron_variant,non_coding_transcript_variant	MODIFIER	-	-	1.819	0.067945	CYB5A (rs7239618)	0.373	CEU
rs1790834	18:74281022-74281022	A	regulatory_region_variant	MODIFIER	-	-	1.819	0.067945	CYB5A (rs7239618)	0.373	CEU
rs1790835	18:74281150-74281150	T	intron_variant	MODIFIER	-	-	0.258	-0.339215	CYB5A (rs7239618)	0.952	CEU
rs1790835	18:74281150-74281150	T	intron_variant,non_coding_transcript_variant	MODIFIER	-	-	0.258	-0.339215	CYB5A (rs7239618)	0.952	CEU
rs1790835	18:74281150-74281150	T	regulatory_region_variant	MODIFIER	-	-	0.258	-0.339215	CYB5A (rs7239618)	0.952	CEU
rs2850585	18:74281686-74281686	G	intron_variant	MODIFIER	-	-	0.338	-0.283204	CYB5A (rs7239618)	0.42	CEU
rs2850585	18:74281686-74281686	G	intron_variant,non_coding_transcript_variant	MODIFIER	-	-	0.338	-0.283204	CYB5A (rs7239618)	0.42	CEU
rs2850585	18:74281686-74281686	G	regulatory_region_variant	MODIFIER	-	-	0.338	-0.283204	CYB5A (rs7239618)	0.42	CEU
rs4891541	18:74280187-74280187	A	intron_variant	MODIFIER	-	-	1.542	0.031123	CYB5A (rs7239618)	0.464	CEU
rs4891541	18:74280187-74280187	T	intron_variant	MODIFIER	-	-	2.009	0.090648	CYB5A (rs7239618)	0.464	CEU
rs4891541	18:74280187-74280187	A	intron_variant,non_coding_transcript_variant	MODIFIER	-	-	1.542	0.031123	CYB5A (rs7239618)	0.464	CEU
rs4891541	18:74280187-74280187	T	intron_variant,non_coding_transcript_variant	MODIFIER	-	-	2.009	0.090648	CYB5A (rs7239618)	0.464	CEU
rs4891542	18:74280673-74280673	A	intron_variant	MODIFIER	-	-	0.167	-0.428811	CYB5A (rs7239618)	0.865	CEU
rs4891542	18:74280673-74280673	A	intron_variant,non_coding_transcript_variant	MODIFIER	-	-	0.167	-0.428811	CYB5A (rs7239618)	0.865	CEU
rs4891542	18:74280673-74280673	A	regulatory_region_variant	MODIFIER	-	-	0.167	-0.428811	CYB5A (rs7239618)	0.865	CEU
rs555355376	18:74284252-74284252	G	intron_variant	MODIFIER	-	-	0.694	-0.137382	CYB5A (rs7239618)	0.385	CEU
rs555355376	18:74284252-74284252	GAG	intron_variant	MODIFIER	-	-	0.662	-0.147058	CYB5A (rs7239618)	0.385	CEU
rs555355376	18:74284252-74284252	T	intron_variant	MODIFIER	-	-	-	-	CYB5A (rs7239618)	0.385	CEU
rs555355376	18:74284252-74284252	G	intron_variant,non_coding_transcript_variant	MODIFIER	-	-	0.694	-0.137382	CYB5A (rs7239618)	0.385	CEU
rs555355376	18:74284252-74284252	GAG	intron_variant,non_coding_transcript_variant	MODIFIER	-	-	0.662	-0.147058	CYB5A (rs7239618)	0.385	CEU
rs555355376	18:74284252-74284252	T	intron_variant,non_coding_transcript_variant	MODIFIER	-	-	-	-	CYB5A (rs7239618)	0.385	CEU
rs555355376	18:74284252-74284252	G	regulatory_region_variant	MODIFIER	-	-	0.694	-0.137382	CYB5A (rs7239618)	0.385	CEU
rs555355376	18:74284252-74284252	GAG	regulatory_region_variant	MODIFIER	-	-	0.662	-0.147058	CYB5A (rs7239618)	0.385	CEU
rs555355376	18:74284252-74284252	T	regulatory_region_variant	MODIFIER	-	-	-	-	CYB5A (rs7239618)	0.385	CEU
rs571843700	18:74284232-74284233	C	intron_variant	MODIFIER	-	-	0.426	-0.23654	CYB5A (rs7239618)	0.89	CEU
rs571843700	18:74284232-74284233	C	intron_variant,non_coding_transcript_variant	MODIFIER	-	-	0.426	-0.23654	CYB5A (rs7239618)	0.89	CEU
rs571843700	18:74284232-74284233	C	regulatory_region_variant	MODIFIER	-	-	0.426	-0.23654	CYB5A (rs7239618)	0.89	CEU
rs60130612	18:74286937-74286937	A	intron_variant	MODIFIER	-	-	11.59	0.997507	CYB5A (rs7239618)	0.464	CEU
rs60130612	18:74286937-74286937	A	intron_variant,non_coding_transcript_variant	MODIFIER	-	-	11.59	0.997507	CYB5A (rs7239618)	0.464	CEU
rs61019092	18:74285970-74285970	A	intron_variant	MODIFIER	-	-	0.052	-0.665179	CYB5A (rs7239618)	0.464	CEU
rs61019092	18:74285970-74285970	A	intron_variant,non_coding_transcript_variant	MODIFIER	-	-	0.052	-0.665179	CYB5A (rs7239618)	0.464	CEU
rs61019092	18:74285970-74285970	A	regulatory_region_variant	MODIFIER	-	-	0.052	-0.665179	CYB5A (rs7239618)	0.464	CEU
rs6566790	18:74280463-74280463	A	intron_variant	MODIFIER	-	-	0.16	-0.43765	CYB5A (rs7239618)	0.89	CEU
rs6566790	18:74280463-74280463	G	intron_variant	MODIFIER	-	-	0.174	-0.420398	CYB5A (rs7239618)	0.89	CEU
rs6566790	18:74280463-74280463	T	intron_variant	MODIFIER	-	-	0.214	-0.378126	CYB5A (rs7239618)	0.89	CEU
rs6566790	18:74280463-74280463	A	intron_variant,non_coding_transcript_variant	MODIFIER	-	-	0.16	-0.43765	CYB5A (rs7239618)	0.89	CEU
rs6566790	18:74280463-74280463	G	intron_variant,non_coding_transcript_variant	MODIFIER	-	-	0.174	-0.420398	CYB5A (rs7239618)	0.89	CEU
rs6566790	18:74280463-74280463	T	intron_variant,non_coding_transcript_variant	MODIFIER	-	-	0.214	-0.378126	CYB5A (rs7239618)	0.89	CEU
rs7231562	18:74280281-74280281	G	intron_variant	MODIFIER	-	-	0.198	-0.393897	CYB5A (rs7239618)	0.89	CEU
rs7231562	18:74280281-74280281	T	intron_variant	MODIFIER	-	-	0.243	-0.351625	CYB5A (rs7239618)	0.89	CEU
rs7231562	18:74280281-74280281	G	intron_variant,non_coding_transcript_variant	MODIFIER	-	-	0.198	-0.393897	CYB5A (rs7239618)	0.89	CEU
rs7231562	18:74280281-74280281	T	intron_variant,non_coding_transcript_variant	MODIFIER	-	-	0.243	-0.351625	CYB5A (rs7239618)	0.89	CEU
rs72963813	18:74281211-74281211	A	intron_variant	MODIFIER	-	-	5.308	0.389346	CYB5A (rs7239618)	0.464	CEU
rs72963813	18:74281211-74281211	A	intron_variant,non_coding_transcript_variant	MODIFIER	-	-	5.308	0.389346	CYB5A (rs7239618)	0.464	CEU
rs72963813	18:74281211-74281211	A	regulatory_region_variant	MODIFIER	-	-	5.308	0.389346	CYB5A (rs7239618)	0.464	CEU
rs72963819	18:74285281-74285281	C	intron_variant	MODIFIER	-	-	1.461	0.019277	CYB5A (rs7239618)	0.464	CEU
rs72963819	18:74285281-74285281	T	intron_variant	MODIFIER	-	-	1.381	0.007119	CYB5A (rs7239618)	0.464	CEU
rs72963819	18:74285281-74285281	C	intron_variant,non_coding_transcript_variant	MODIFIER	-	-	1.461	0.019277	CYB5A (rs7239618)	0.464	CEU
rs72963819	18:74285281-74285281	T	intron_variant,non_coding_transcript_variant	MODIFIER	-	-	1.381	0.007119	CYB5A (rs7239618)	0.464	CEU
rs72963819	18:74285281-74285281	C	regulatory_region_variant	MODIFIER	-	-	1.461	0.019277	CYB5A (rs7239618)	0.464	CEU
rs72963819	18:74285281-74285281	T	regulatory_region_variant	MODIFIER	-	-	1.381	0.007119	CYB5A (rs7239618)	0.464	CEU
